# Supplementary material
Source: PubMed Central journal article supplement (PMC5710506)
Supplement: jamacardiol-2-1120-s001.pdf [file jamacardiol-2-1120-s001.pdf]

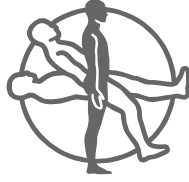

**Medtronic**

*Alleviating Pain · Restoring Health · Extending Life*

1  
2

# REVEAL AF

3  
4  
5

## Clinical Investigation Plan

6  
7

Version 2

8  
9

12-APR-2013

10  
11

|                                                                                               |                                                                                                                         |
|-----------------------------------------------------------------------------------------------|-------------------------------------------------------------------------------------------------------------------------|
| Medtronic, Inc.<br>8200 Coral Sea Street NE<br>Mounds View, MN U.S.A. 55112<br>1-800-328-2518 | Medtronic, Bakken Research Center B.V.<br>Endepolsdomein 5<br>6229 GW Maastricht<br>The Netherlands<br>+31-43-35-66-566 |
|-----------------------------------------------------------------------------------------------|-------------------------------------------------------------------------------------------------------------------------|

12  
13

14 **TABLE OF CONTENTS**

15

16 **LISTING OF TABLES..... 6**

17 **LISTING OF FIGURES..... 6**

18 **CONTACT INFORMATION ..... 7**

19 **STEERING COMMITTEE ..... 8**

20 **1. INTRODUCTION ..... 9**

21 1.1 Study purpose ..... 9

22 1.2 Study Scope ..... 9

23 **2. BACKGROUND AND JUSTIFICATION ..... 9**

24 **3. SYSTEM DESCRIPTION AND INTENDED USE..... 10**

25 3.1 Reveal Insertable Cardiac Monitor ..... 11

26 3.2 Medtronic CareLink Programmer ..... 12

27 3.3 Reveal Patient Assistant ..... 12

28 3.4 Medtronic CareLink Monitor ..... 12

29 3.5 Additional: Medtronic CareLink network..... 12

30 **4. REGULATORY COMPLIANCE ..... 12**

31 **5. METHODOLOGY ..... 13**

32 5.1 Study design..... 13

33 5.2 Study objectives ..... 14

34 5.2.1 *Primary objective* ..... 14

35 5.2.2 *Secondary objectives* ..... 14

36 5.2.3 *Exploratory objectives* ..... 14

37 5.3 Subject selection criteria ..... 14

38 5.3.1 *Inclusion criteria* ..... 14

39 5.3.2 *Exclusion criteria* ..... 15

40 5.3.3 *Point of enrollment* ..... 15

41 5.4 Randomization ..... 15

42 5.5 Minimization of Bias ..... 15

43 **6. STUDY PROCEDURES ..... 16**

44 6.1 Site initiation and activation ..... 16

45 6.2 Equipment requirements ..... 17

46 6.3 Data collection..... 17

47 6.4 Patient informed consent process ..... 19

48 6.5 Enrollment and baseline ..... 21

49 6.6 Implant..... 22

50 6.6.1 *Programming Requirements* ..... 23

51 6.7 Reprogramming..... 23

52 6.8 Subject CareLink Transmissions ..... 23

|    |                        |                                                                                     |           |
|----|------------------------|-------------------------------------------------------------------------------------|-----------|
| 53 | 6.9                    | Scheduled follow-up visits .....                                                    | 23        |
| 54 | 6.10                   | Unscheduled visits .....                                                            | 24        |
| 55 | 6.11                   | Healthcare Utilization .....                                                        | 25        |
| 56 | 6.12                   | System Modification .....                                                           | 25        |
| 57 | 6.13                   | Study Exit .....                                                                    | 26        |
| 58 |                        | 6.13.1 <i>Lost to follow-up</i> .....                                               | 26        |
| 59 |                        | 6.13.2 <i>Subject-initiated and investigator withdrawal</i> .....                   | 26        |
| 60 |                        | 6.13.3 <i>Study exit upon sponsor request</i> .....                                 | 26        |
| 61 | 6.14                   | Medications .....                                                                   | 26        |
| 62 | <b>7.</b>              | <b>DEVICE STORAGE, HANDLING AND TRACEABILITY .....</b>                              | <b>27</b> |
| 63 | 7.1                    | Final product disposition.....                                                      | 27        |
| 64 | <b>8.</b>              | <b>STUDY DEVIATIONS.....</b>                                                        | <b>27</b> |
| 65 | 8.1                    | Reporting timelines.....                                                            | 28        |
| 66 | <b>9.</b>              | <b>ADVERSE EVENTS AND DEVICE DEFICIENCIES.....</b>                                  | <b>28</b> |
| 67 | 9.1                    | Adverse Event (AE) and Device Deficiency Assessment.....                            | 28        |
| 68 |                        | 9.1.1 <i>Adverse Events</i> .....                                                   | 28        |
| 69 |                        | 9.1.2 <i>Processing Updates and Resolution</i> .....                                | 29        |
| 70 | 9.2                    | Adverse Event definitions, classification and reporting .....                       | 29        |
| 71 |                        | 9.2.1 <i>Adverse Event Definitions</i> .....                                        | 29        |
| 72 |                        | 9.2.2 <i>Adverse Event and Device Deficiency classification and reporting</i> ..... | 30        |
| 73 | 9.3                    | Subject death .....                                                                 | 31        |
| 74 |                        | 9.3.1 <i>Death data collection</i> .....                                            | 31        |
| 75 |                        | 9.3.2 <i>Death classification and reporting</i> .....                               | 31        |
| 76 | 9.4                    | Market-released reporting requirements .....                                        | 32        |
| 77 | 9.5                    | Adverse Event and Device Deficiency records and reporting requirements ..           | 33        |
| 78 | <b>10.</b>             | <b>RISK ANALYSIS .....</b>                                                          | <b>34</b> |
| 79 | 10.1                   | Risk Minimization .....                                                             | 35        |
| 80 | 10.2                   | Potential Benefits .....                                                            | 35        |
| 81 | 10.3                   | Risk-to-Benefit Analysis .....                                                      | 35        |
| 82 | <b>11.</b>             | <b>PLANNED STUDY CLOSURE, EARLY TERMINATION OF STUDY OR STUDY</b>                   |           |
| 83 | <b>SUSPENSION.....</b> |                                                                                     | <b>36</b> |
| 84 | 11.1                   | Planned study closure .....                                                         | 36        |
| 85 | 11.2                   | Early termination or suspension .....                                               | 36        |
| 86 |                        | 11.2.1 <i>Study-wide termination or suspension</i> .....                            | 36        |
| 87 |                        | 11.2.2 <i>Investigator/center termination or suspension</i> .....                   | 36        |
| 88 | 11.3                   | Procedures for termination or suspension.....                                       | 37        |
| 89 |                        | 11.3.1 <i>Medtronic-initiated</i> .....                                             | 37        |
| 90 |                        | 11.3.2 <i>Investigator-initiated</i> .....                                          | 37        |
| 91 |                        | 11.3.3 <i>EC/IRB committee-initiated</i> .....                                      | 37        |
| 92 | <b>12.</b>             | <b>STATISTICAL METHODS AND DATA ANALYSIS .....</b>                                  | <b>38</b> |
| 93 | 12.1                   | Primary Objective .....                                                             | 38        |
| 94 |                        | 12.1.1 <i>Hypothesis</i> .....                                                      | 38        |

|     |        |                                                                               |    |
|-----|--------|-------------------------------------------------------------------------------|----|
| 95  | 12.1.2 | Endpoint Definition                                                           | 38 |
| 96  | 12.1.3 | Performance Requirements                                                      | 38 |
| 97  | 12.1.4 | Rationale for Performance Criteria                                            | 38 |
| 98  | 12.1.5 | Sample Size Determination                                                     | 38 |
| 99  | 12.1.6 | Analysis Methods                                                              | 38 |
| 100 | 12.1.7 | Determination of Subjects/Data for Analysis                                   | 39 |
| 101 | 12.2   | Secondary Objective #1: Predictors of AF.....                                 | 39 |
| 102 | 12.2.1 | Identify predictors of AF onset in patients who are at high risk of having AF |    |
| 103 |        | Hypothesis                                                                    | 39 |
| 104 | 12.2.2 | Endpoint Definition                                                           | 39 |
| 105 | 12.2.3 | Performance Requirements                                                      | 39 |
| 106 | 12.2.4 | Sample Size Determination                                                     | 39 |
| 107 | 12.2.5 | Analysis Methods                                                              | 40 |
| 108 | 12.2.6 | Determination of Subjects/Data for Analysis                                   | 41 |
| 109 | 12.3   | Secondary Objective #2: Clinical Actions for AF .....                         | 41 |
| 110 | 12.3.1 | Hypothesis                                                                    | 41 |
| 111 | 12.3.2 | Endpoint Definition                                                           | 41 |
| 112 | 12.3.3 | Performance Requirements                                                      | 41 |
| 113 | 12.3.4 | Sample Size Determination                                                     | 41 |
| 114 | 12.3.5 | Analysis Methods                                                              | 41 |
| 115 | 12.3.6 | Determination of Patients/Data for Analysis                                   | 42 |
| 116 | 12.4   | Exploratory Objective #1: AF Burden .....                                     | 42 |
| 117 | 12.4.1 | Hypothesis                                                                    | 42 |
| 118 | 12.4.2 | Endpoint Definition                                                           | 42 |
| 119 | 12.4.3 | Performance Requirements                                                      | 42 |
| 120 | 12.4.4 | Sample Size Determination                                                     | 42 |
| 121 | 12.4.5 | Analysis Methods                                                              | 42 |
| 122 | 12.4.6 | Determination of Patients/Data for Analysis                                   | 43 |
| 123 | 12.5   | Exploratory Objective #2: Non-atrial Arrhythmias.....                         | 43 |
| 124 | 12.5.1 | Hypothesis                                                                    | 43 |
| 125 | 12.5.2 | Endpoint Definition                                                           | 43 |
| 126 | 12.5.3 | Performance Requirements                                                      | 43 |
| 127 | 12.5.4 | Sample Size Determination                                                     | 43 |
| 128 | 12.5.5 | Analysis Methods                                                              | 43 |
| 129 | 12.5.6 | Determination of Patients/Data for Analysis                                   | 43 |
| 130 | 12.6   | Exploratory Objective #3: Quality of Life .....                               | 44 |
| 131 | 12.6.1 | Hypothesis                                                                    | 44 |
| 132 | 12.6.2 | Endpoint Definition                                                           | 44 |
| 133 | 12.6.3 | Performance Requirements                                                      | 44 |
| 134 | 12.6.4 | Sample Size Determination                                                     | 44 |
| 135 | 12.6.5 | Analysis Methods                                                              | 44 |
| 136 | 12.6.6 | Determination of Patients/Data for Analysis                                   | 44 |
| 137 | 12.7   | Exploratory Objective #4: Healthcare Utilization .....                        | 45 |
| 138 | 12.7.1 | Hypothesis                                                                    | 45 |
| 139 | 12.7.2 | Endpoint Definition                                                           | 45 |
| 140 | 12.7.3 | Performance Requirements                                                      | 45 |
| 141 | 12.7.4 | Sample Size Determination                                                     | 45 |
| 142 | 12.7.5 | Analysis Methods                                                              | 45 |
| 143 | 12.7.6 | Determination of Patients/Data for Analysis                                   | 45 |
| 144 | 12.8   | Exploratory Objective #5: Progression to Persistent AF.....                   | 46 |

|     |            |                                                                           |           |
|-----|------------|---------------------------------------------------------------------------|-----------|
| 145 | 12.8.1     | <i>Hypothesis</i>                                                         | 46        |
| 146 | 12.8.2     | <i>Endpoint Definition</i>                                                | 46        |
| 147 | 12.8.3     | <i>Performance Requirements</i>                                           | 46        |
| 148 | 12.8.4     | <i>Sample Size Determination</i>                                          | 46        |
| 149 | 12.8.5     | <i>Analysis Methods</i>                                                   | 46        |
| 150 | 12.8.6     | <i>Determination of Patients/Data for Analysis</i>                        | 47        |
| 151 | 12.9       | General considerations .....                                              | 47        |
| 152 | 12.10      | Missing data .....                                                        | 47        |
| 153 | 12.11      | Adjustments for Covariates .....                                          | 48        |
| 154 | 12.12      | Subgroup analysis .....                                                   | 48        |
| 155 | <b>13.</b> | <b>DATA AND QUALITY MANAGEMENT .....</b>                                  | <b>48</b> |
| 156 | <b>14.</b> | <b>WARRANTY/INSURANCE INFORMATION .....</b>                               | <b>48</b> |
| 157 | 14.1       | Warranty .....                                                            | 48        |
| 158 | 14.2       | Insurance (Europe).....                                                   | 49        |
| 159 | <b>15.</b> | <b>MONITORING .....</b>                                                   | <b>49</b> |
| 160 | 15.1       | Monitoring Visits .....                                                   | 49        |
| 161 | <b>16.</b> | <b>REQUIRED RECORDS AND REPORTS.....</b>                                  | <b>49</b> |
| 162 | 16.1       | Investigator records .....                                                | 49        |
| 163 | 16.2       | Investigator reports.....                                                 | 50        |
| 164 | 16.3       | Sponsor records .....                                                     | 51        |
| 165 | 16.4       | Sponsor reports .....                                                     | 52        |
| 166 |            | <b>APPENDIX A: DRAFT CASE REPORT FORMS.....</b>                           | <b>54</b> |
| 167 |            | <b>APPENDIX B: PRELIMINARY PUBLICATION PLAN.....</b>                      | <b>55</b> |
| 168 |            | <b>APPENDIX C: COMMITTEES .....</b>                                       | <b>56</b> |
| 169 |            | <b>APPENDIX D: STUDY OVERVIEW / SYNOPSIS .....</b>                        | <b>57</b> |
| 170 |            | <b>APPENDIX E: INFORMED CONSENT TEMPLATES.....</b>                        | <b>59</b> |
| 171 |            | <b>APPENDIX F: PARTICIPATING INVESTIGATORS AND INSTITUTIONS .....</b>     | <b>60</b> |
| 172 |            | <b>APPENDIX G: EC/IRBLIST .....</b>                                       | <b>61</b> |
| 173 |            | <b>APPENDIX H: LABELING.....</b>                                          | <b>62</b> |
| 174 |            | <b>APPENDIX I: MODIFICATIONS TO THE CLINICAL INVESTIGATION PLAN .....</b> | <b>63</b> |
| 175 |            | <b>APPENDIX J: LITERATURE REVIEW, PRE-CLINICAL TESTING AND PREVIOUS</b>   |           |
| 176 |            | <b>INVESTIGATIONS.....</b>                                                | <b>65</b> |
| 177 |            | <b>APPENDIX K: BIBLIOGRAPHY .....</b>                                     | <b>66</b> |
| 178 |            |                                                                           |           |

179 **LISTING OF TABLES**

180 Table 1: Steering Committee contact information ..... **Error! Bookmark not defined.**

181 Table 2: System component information..... 11

182 Table 3: Data collection and study procedures ..... 19

183 Table 4: ICM device programming requirements ..... 23

184 Table 5: Follow-up schedule and visit windows ..... 24

185 Table 6 Recommended programming parameters for Medtronic IPG, ICD or CRT

186 devices ..... 25

187 Table 7: Adverse Event definitions..... 29

188 Table 8: Adverse Event classification responsibilities ..... 31

189 Table 9: Subject death classification responsibilities ..... 32

190 Table 10: Adverse Event Reporting Requirements..... 33

191 Table 11: Power Calculations for Predictor Objective Assuming 10% Annual Attrition ... 40

192 Table 12: Investigator reports applicable to the United States..... 51

193 Table 13: Investigator reports applicable to Europe..... 51

194 Table 14: Sponsor reports for the United States ..... 52

195 Table 15: Sponsor reports for Europe ..... 52

196

197 **LISTING OF FIGURES**

198

199 Figure 1. Components of the Medtronic Reveal XT ICM system. .... 10

200

201 **CONTACT INFORMATION**

202 The clinical study will be sponsored by:

203

204 Medtronic, Inc.

205 8200 Coral Sea Street NE

206 Mounds View, MN U.S.A. 55112

207 1-800-328-2518

208

209

Medtronic, Bakken Research Center B.V.

Endepolsdomein 5

6229 GW Maastricht

The Netherlands

+31-43-35-66-566

210 **STEERING COMMITTEE**

211 Medtronic, as the study sponsor, will maintain study oversight. The role of the steering committee  
212 is to provide input into study design and implementation.

213



## 1.4 INTRODUCTION

### 215 1.1 Study purpose

216 Medtronic, Inc. is sponsoring REVEAL AF a prospective, single arm, open-label, multi-  
217 center, post-market interventional clinical study to determine, via continuous monitoring  
218 with the Reveal XT implantable cardiac monitor (ICM) or newer approved version  
219 (referred to in the remainder of the document as Reveal ICM), the incidence of atrial  
220 fibrillation (AF) in patients suspected to be at high risk for having AF and to understand  
221 how physicians manage these patients once AF has been detected. Furthermore, the  
222 study will seek to identify what patient characteristics are most predictive of developing  
223 AF. This information may facilitate the ability to identify those patients that are at highest  
224 risk for developing AF, and for whom Reveal ICM may be most beneficial and potentially  
225 cost saving.

### 226 1.2 Study Scope

227 The study is expected to be conducted at approximately 60 clinical centers located in the  
228 United States (~45 centers) and Europe (~15 centers). Based on previous studies of  
229 comparable scope and magnitude, it is estimated that centers will identify, on average,  
230 about 6-10 eligible potential study subjects.

231 Up to 450 subjects are planned to be enrolled into the study, to have approximately 400  
232 patients implanted with the Reveal ICM. To ensure that the data are derived from a  
233 widespread spectrum of centers and thereby minimize center bias, a maximum number of  
234 40 subjects will be implanted at a single center. In addition to ensure a robust dataset is  
235 available for subgroup analysis, a minimum of 70 subjects with a CHADS<sub>2</sub> score of 2, 3,  
236 or ≥4 per the inclusion criteria, will be implanted in each of these three subgroups. If  
237 needed, enrollment will be halted for a given CHADS<sub>2</sub> subgroup to ensure a minimum of  
238 70 subjects are implanted with a CHADS<sub>2</sub> score of 2, 3, and ≥4, respectively. Centers  
239 that enroll faster than others will be allowed to do so in order to maintain an adequate  
240 overall study enrollment rate, but not exceed the maximum number implanted per site.

## 2.1 BACKGROUND AND JUSTIFICATION

242 Atrial fibrillation (AF) is the most common diagnosed cardiac arrhythmia<sup>1,2</sup>, with the  
243 number of cases in the adult US population estimated at approximately 3 million and in  
244 the European Union 4.5 million cases are estimated<sup>3,4,5</sup>. AF is associated with significant  
245 morbidity and mortality due to cerebrovascular complications such as stroke; which lead  
246 to a substantial economic impact on the health care system<sup>7,8</sup>. Therefore, the ability to  
247 identify AF is paramount for guiding preventative therapy decisions in patients suspected  
248 of, or who have clinical risk factors (e.g. congestive heart failure or hypertension), for  
249 having AF or a stroke. However, the incidence of AF in patients suspected to be at high  
250 risk for having AF is not known.

251 Several aspects make AF difficult to diagnosis, such as patient symptoms not being  
252 reliably correlated with AF episodes, the frequency of the episodes (i.e. paroxysmal vs.  
253 persistent), and frequency of ECG monitoring<sup>8-13</sup>. It is well established that with  
254 intermittent and symptom based monitoring, there is low sensitivity to accurately identify  
255 patients with AF episodes. Studies have shown that of the AF episodes on a pacemaker

256 log, only 13% to 21% of those AF episodes had symptoms as reported by the patient<sup>14, 15</sup>.  
257 Given the limitations of intermittent monitoring and symptoms as an index of AF,  
258 continuous cardiac monitoring may provide an important tool in both the diagnosis and  
259 follow-up management of AF.

260 Symptomology such as dyspnea, chest pain, palpitations, dizziness, or fatigue, are  
261 common reasons for patients to visit a physician for assessment<sup>16</sup> and may be indicators  
262 of the development of AF<sup>17</sup>. However, as stated above patient symptoms are poorly  
263 correlated with AF episodes and also, they are non-specific and may result from other  
264 causes. Certain patient comorbidities have been shown to be associated with the  
265 development of AF and stroke. Physicians estimate the risk of stroke in AF patients  
266 using either the CHADS<sub>2</sub> or CHA<sub>2</sub>DS<sub>2</sub>-VAS<sub>c</sub> scoring system<sup>18, 19</sup>. The CHADS<sub>2</sub> scoring  
267 system is based on the following risk factors; congestive heart failure, hypertension, age  
268 greater than 75 years, diabetes, and prior stroke or transient ischemic attack (doubled).  
269 The more recently developed scoring system of CHA<sub>2</sub>DS<sub>2</sub>-VAS<sub>c</sub> is based on the factors of  
270 congestive heart failure, hypertension, age ≥ 75 (doubled), diabetes, stroke (doubled)–  
271 vascular disease, age 65-74, and sex category. A higher score in either system is  
272 associated with an increased rate of stroke or TIA. Therefore, these scores are used to  
273 guide anticoagulant therapy decisions for the treatment of AF. AF therapy also, may  
274 include restoring and maintaining normal sinus rhythm, and/or control of the ventricular  
275 rates. Additional risk factors such as coronary artery disease, renal impairment, sleep  
276 apnea, and chronic obstructive pulmonary disease have also been shown to be risk  
277 factors associated with AF<sup>20</sup>. For the current study, given there is not a unified way to  
278 estimate AF development in patients that are at high risk of developing AF, elements from  
279 the CHADS<sub>2</sub> or CHA<sub>2</sub>DS<sub>2</sub>-VAS<sub>c</sub> scoring systems will be utilized to define the high risk  
280 patient population<sup>21</sup>.  
281

## 282 **3.2 SYSTEM DESCRIPTION AND INTENDED USE**

283 The study will be conducted using the components of the Medtronic Reveal ICM device.  
284 Depicted in Figure 1 and outlined in Table 1 below are the components for the Reveal XT  
285 ICM. The Medtronic Reveal ICM system is being used within the clinical investigation  
286 plan (CIP) in accordance with the indications for the device. The Reveal ICM is indicated  
287 for:

- 288 • Individuals with clinical syndromes or situations at increased risk of cardiac  
289 arrhythmias.
- 290 • Individuals who experience transient symptoms such as dizziness, palpitation,  
291 syncope, and chest pain that may suggest a cardiac arrhythmia.

292  
293  
294  
295  
296  
297  
298  
299  
300

**Figure 1. Components of the Medtronic Reveal XT ICM system.**

301

302 (Not drawn to scale)

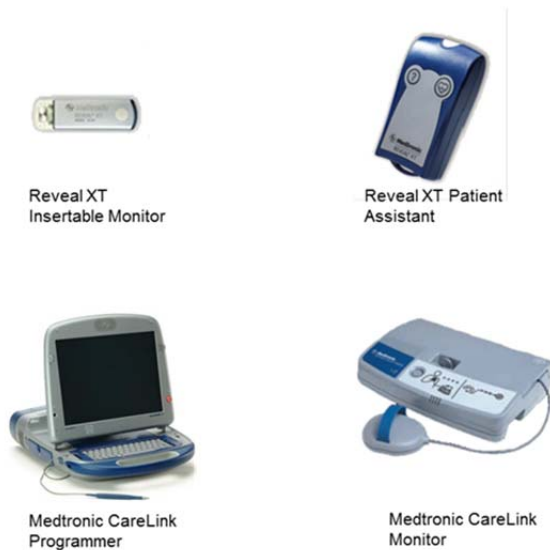

303

304

305

306 Instructions for use of the devices are provided in their respective manuals. Study  
307 system components are being used without modification.

308

309 **Table 1: System component information**

| Model Number                                                     | Component                     | Market-released |
|------------------------------------------------------------------|-------------------------------|-----------------|
| Model 9529 with FullView™ Software (or later Medtronic releases) | Reveal XT Insertable Monitor  | Market-released |
| Model 2090 with FullView™ Software (or later Medtronic releases) | Medtronic CareLink Programmer | Market-released |
| 9539 (or later Medtronic releases)                               | Reveal XT Patient Assistant   | Market-released |
| 2490G (or later Medtronic releases)                              | Medtronic CareLink Monitor    | Market-released |

310 Note: The labels for the Reveal ICM components are available in English and where  
311 available in the local language.

312 **3.1 Reveal Insertable Cardiac Monitor**

313 The Reveal ICM (model 9529 with FullView™ software Model SW007 or later Medtronic  
314 releases) is a leadless device that is typically implanted under the skin in the region of the  
315 thorax. Two electrodes on the body of the device continuously monitor the patient's  
316 subcutaneous ECG. The device can store up to 22.5 min of ECG recordings from the  
317 patient-activated episodes and up to 27 min of ECG recordings from automatically  
318 detected arrhythmias. When the ECG storage log within the monitor is full, the ECG

319 record from the most recent episode will overwrite the ECG data from the oldest stored  
320 episode for that same arrhythmia category. Documentation of episode occurrence will be  
321 retained.

322 A Vector Check tool is incorporated in the packaging of the Reveal XT. The Vector check  
323 tool enables the implanting physician to select the most optimal implantation site while  
324 the Reveal ICM is still in the sterile package. Future approved Reveal ICM devices can  
325 be used with similar functionality.

### 326 **3.2 Medtronic CareLink Programmer**

327 The Medtronic CareLink Programmer (Model 2090 with FullView™ software Model  
328 SW007 or later Medtronic releases) is used to program the Reveal ICM to detect  
329 arrhythmias with various pre-specified characteristics. In addition, the programmer allows  
330 the physician to view, save, and print the ECG records currently held within the Reveal  
331 ICM.

### 332 **3.3 Reveal Patient Assistant**

333 The Reveal Patient Assistant (Model 9539 or later Medtronic releases) is a battery-  
334 operated, hand-held telemetry device that enables the patient, on experiencing symptoms  
335 potentially indicative of a cardiac event, to manually trigger the Reveal ICM to collect and  
336 store an ECG record. When the recording is manually triggered in this way (i.e., the  
337 Symptoms button is pressed), the Patient Assistant device also shows the patient  
338 whether it successfully received the telemetry transfer from the Reveal ICM, as well as  
339 whether the battery of the Patient Assistant device is low.

340 Lastly, the patient can use a query button on the Patient Assistant device for direct  
341 feedback about whether the Reveal has registered an arrhythmia and/or whether criteria  
342 have been met for the patient to take action to contact the physician or clinic. The  
343 notification criteria are selected and pre-programmed by the care provider.

### 344 **3.4 Medtronic CareLink Monitor**

345 The CareLink Monitor (Model 2490G or later Medtronic releases) is a device that enables  
346 the device diagnostic data (which includes ECG data) to be transmitted directly from the  
347 Reveal ICM to the Medtronic CareLink Network for review by the physician.

### 348 **3.5 Additional: Medtronic CareLink network**

349 The Medtronic CareLink network is an internet-based remote service for monitoring  
350 patients with implanted Medtronic cardiac devices. The physician can access the  
351 CareLink network, a secured network with restricted access, to review the device data  
352 that has been uploaded from the implanted Reveal monitor.

## 453 **REGULATORY COMPLIANCE**

354 The REVEAL AF clinical study is a multicenter, post market, interventional clinical trial.  
355 The study was designed to reflect the good clinical practice principles outlined in ISO  
356 14155:2011. These include the protection of the rights, safety and well-being of human  
357 subjects, controls to ensure the scientific conduct and credibility of the clinical  
358 investigation and the definition of responsibilities of the sponsor and investigators.  
359 Information regarding the safety and efficacy of the Reveal ICM has previously been  
360 evaluated and are summarized in the Clinical Evaluation Report, Version 3.0, for

361 Medtronic's Insertable Cardiac Monitors. For the Reveal AF study, the Reveal ICM  
362 system will be used in accordance with the approved label. The objectives of this post-  
363 market interventional clinical study are not to evaluate the safety and efficacy of the  
364 Reveal ICM.

365 The study will additionally be conducted in compliance with the Clinical Investigation Plan  
366 (CIP) and the applicable local laws and regulations of each participating country,  
367 including data protection laws and any requirements imposed by the local Competent  
368 Authority (CA) and Ethics Committee (EC) and Institutional Review Board (IRB).

369 The principles of the Declaration of Helsinki have been implemented through the patient  
370 informed consent process, EC/IRB approval, data protection, study training, clinical study  
371 registration, preclinical testing, risk benefit assessment and publication policy. In addition,  
372 compliance with US Food and Drug Administration (FDA) 21 CFR parts 11 is required for  
373 all participating geographies.

374 This study will be publicly registered prior to first enrollment in accordance with the 2007  
375 Food and Drug Administration Amendments Act (FDAAA) and Declaration of Helsinki on  
376 <http://clinicaltrials.gov> (PL 110-85, Section 810(a)).

377 In the United States this is a non-investigational device study and is exempt from 21 CFR  
378 812, and the study will be conducted in compliance with relevant local laws which are US  
379 Title 21 CFR parts

- 380 • 50: Protection of Human Subjects
- 381 • 56: Institutional Review Boards

382 In Europe, each country will comply with its local laws and the Active Implantable Medical  
383 Device Directive (AIMDD) as applicable.

384 Approval of the CIP or CIP amendments is required from the following groups prior to any  
385 study procedures at a clinical study center: Medtronic, geography-specific regulatory  
386 authorities (if regulatory approval is required), and an EC/IRB.

## 5.7 **METHODOLOGY**

### 388 **5.1 Study design**

389 The REVEAL AF study is a prospective, single arm, open-label, multi-center, post-market  
390 interventional study to evaluate the incidence of AF in patients that are suspected to be at  
391 high risk of having AF, as defined by a modified CHADS<sub>2</sub> score as defined in the inclusion  
392 criteria. Prior to initiating any study specific procedures, patients must sign and date an  
393 informed consent form (ICF) to be enrolled in the study. Up to 450 subjects are planned  
394 to be enrolled into the study, to have approximately 400 patients implanted with the  
395 Reveal ICM. Inclusion/Exclusion criteria will be evaluated and the patients' medical  
396 history and baseline information will be collected and then the Reveal ICM device will be  
397 implanted. Enrolled subjects who have a successful Reveal ICM implant will then be  
398 followed for a minimum of 18 months to monitor for the detection of AF, and up to a  
399 maximum of 30 months or until the last subject has completed their 18 month follow-up  
400 visit. During the follow-up period, subjects will have in-office visits every 6 months and  
401 will transmit device data via CareLink® on a monthly basis. The total duration of  
402 enrollment is anticipated to last approximately 24 months and the study duration is  
403 anticipated to last approximately 42 months.

404 **5.2 Study objectives**

405 **5.2.1 Primary objective**

406 Determine the incidence rate of atrial fibrillation lasting greater than or equal to  
407 six minutes in patients who are at high risk of having atrial fibrillation.

408 **5.2.2 Secondary objectives**

- 409 • Identify predictors of AF onset in patients who are at high risk of having atrial  
410 fibrillation.
- 411 • Characterize the timing and nature of clinical actions relative to detection of AF in  
412 patients who are at high risk of having atrial fibrillation.

413 **5.2.3 Exploratory objectives**

- 414 • Characterize AF burden over time in patients who are at high risk of having atrial  
415 fibrillation.
- 416 • Characterize the presence of non-atrial arrhythmias in patients who are at high  
417 risk of having atrial fibrillation.
- 418 • Characterize Quality of Life over time in patients who are at high risk of having  
419 atrial fibrillation.
- 420 • Characterize healthcare utilization in patients who are at high risk of having atrial  
421 fibrillation.
- 422 • Identify predictors of progression to persistent AF in patients who are at high risk  
423 of having atrial fibrillation.

424 **5.3 Subject selection criteria**

425 Subjects will be screened to ensure they meet all of the inclusion and meet none of the  
426 exclusion criteria. Institutional Review Board / Medical Ethics Committee (IRB/EC)  
427 approval of the REVEAL AF CIP and ICF must be obtained prior to enrolling patients in  
428 the study.

429 **5.3.1 Inclusion criteria**

430

- 431 • Patient meets the approved indications to receive the Reveal ICM
- 432 • Patient is suspected, based on symptomatology and/or demographics, of having  
433 atrial fibrillation or at high risk of having AF, as determined by the clinical  
434 investigator
- 435 • Patient has a CHADS<sub>2</sub> score ≥ 3 OR has a CHADS<sub>2</sub> score = 2 with at least one  
436 of the following documented:
- 437 ○ Coronary artery disease
- 438 ○ Renal impairment (GFR 30-60 ml/min)
- 439 ○ Sleep apnea
- 440 ○ Chronic obstructive pulmonary disease
- 441

442 Note: stroke/TIA criterion as part of the CHADS<sub>2</sub> score for this trial is limited to  
443 either an ischemic stroke or TIA, which occurred more than one year prior to  
444 enrollment.  
445

- 446 • Patient is 18 years of age or older
- 447 • Patient has a life expectancy of 18 months or more
- 448 • Patient, or legally authorized representative, is willing to sign and date the  
449 consent form
- 450 • Patient is willing and able to be remotely monitored (i.e., eligible for enrollment  
451 into the Medtronic CareLink Network)

### 452 5.3.2 Exclusion criteria

- 453 • Patient has a documented history of AF or atrial flutter
- 454 • Patient had an ischemic stroke or TIA within past year prior to enrollment
- 455 • Patient has a history of a hemorrhagic stroke
- 456 • Patient is currently implanted with an IPG, ICD, CRT-P, or CRT-D device
- 457 • NYHA Class IV Heart Failure patient
- 458 • Patient had heart surgery within previous 90 days prior to enrollment
- 459 • Patient had an MI within the previous 90 days prior to enrollment
- 460 • Patient is taking chronic immuno-suppressant therapy
- 461 • Patient is taking an anti-arrhythmic drug
- 462 • Patient is contraindicated for long term anticoagulation medication
- 463 • Patient is taking a long-term anticoagulation medication
- 464 • Any concomitant condition which, in the opinion of the investigator, would not  
465 allow safe participation in the study (e.g., drug addiction, alcohol abuse, emotional  
466 / psychological diagnosis)
- 467 • Patient is enrolled in another study that could confound the results of this study,  
468 without documented pre-approval from Medtronic study manager
- 469 • Patient has a creatinine clearance <30 ml/min (completed within past 6 months  
470 prior to enrollment) or is on dialysis
  - 471 ○ Note: if the clinical investigator suspects the renal dysfunction to be  
472 reversible a single repeat creatinine clearance assessment can be made.

### 473 5.3.3 Point of enrollment

474 A subject is considered enrolled upon signing the ICF.

## 475 5.4 Randomization

476 No randomization will be employed. All subjects will receive a Medtronic Reveal ICM.

## 477 5.5 Minimization of Bias

478 Selection of subjects, treatment of subjects, and evaluation of study data are potential  
479 sources of bias. Methods incorporated in the study design to minimize potential bias  
480 include (but are not limited to):

- 481 • Subjects will be screened to confirm eligibility for enrollment in keeping with the  
482 inclusion/exclusion criteria.

- 483 • Subjects will be characterized at baseline on demographic factors as well as a  
484 wide variety of clinical factors related to cardiovascular status and potential risk for  
485 AF.
- 486 • To ensure a widespread distribution of data between centers, the maximum  
487 number of implanted subjects per center is 40 subjects.
- 488 • Data collection requirements and study procedures will be standardized across all  
489 centers and geographies.
- 490 • All study center personnel and Medtronic personnel will be trained on their  
491 respective aspects of the study using standardized training materials. All study  
492 clinicians will be trained on and required to follow the CIP.
- 493 • A statistical analysis plan will be developed prior to analyzing data which will  
494 document all pre-specified analyses and analysis methods.
- 495 • An AF Adjudication Committee comprised of individuals experienced with  
496 identifying AF will review the device EGM records to ensure AF was appropriately  
497 identified.
- 498 In summary, potential sources of bias that may be encountered in this clinical  
499 investigation have been considered and minimized by careful study design.

## 600 **STUDY PROCEDURES**

501 All clinical investigators managing the subject's condition during the study must be  
502 qualified practitioners who are experienced in the diagnosis and medical management of  
503 arrhythmias such as AF. Clinical investigators must have the capability and be willing and  
504 able to manage CareLink® data and enforce data transmission compliance effectively.  
505 Implanting physicians must be experienced in handling and implanting cardiac monitoring  
506 devices.

### 507 **6.1 Site initiation and activation**

508 During the activation process, Medtronic will train site personnel on the CIP, relevant  
509 standards and regulations, informed consent process, and data collection and reporting  
510 tools for the study. If new members join the investigational site team, they will receive  
511 training by Medtronic (or designee) on the applicable clinical investigation requirements  
512 before contributing to the clinical investigation.

513 Prior to performing study related activities, all sites must have EC/IRB approval, as  
514 applicable for that geography, and Medtronic has provided written acknowledgement that  
515 all pre-study documentation has been received and all training has been completed.

516 All local and regional regulatory requirements will be fulfilled prior to center activation and  
517 enrollment of subjects into the study. Requirements for activation vary by geography,  
518 and may include, but are not limited to:

- 519 • Signed and dated non-disclosure (confidentiality) agreement/IRB approval letter  
520 for the current version of the CIP and Medtronic approved ICF
- 521 • Regulatory approval (e.g. Competent Authority (CA) approval) or notification (if  
522 required per geography)
- 523 • Investigator(s) Curriculum Vitae (CV) on file with sponsor (Unites States)



- 524 • Signed and dated Curriculum Vitae (CV) of the Investigator(s) and all key
- 525 participants in the study on file with sponsor (Europe)
- 526 • Signed and dated Clinical Trial Agreement (CTA) on file with sponsor
- 527 • Signed and dated documentation of training of required study personnel
- 528 • Delegation and Training documentation
- 529 • Insurance certificate (if required per geography)

530

531 All site staff authorized to conduct study tasks must be trained on the current version of  
532 the CIP and must be delegated by the principal investigator to perform study related  
533 activities.

534 Technical training (e.g. product overview, Reveal ICM programming, implant procedures,  
535 CareLink®), either initial or refresher, must be completed by the physicians and other site  
536 personnel in accordance with their respective roles in the study.

537 Signed training documentation must be maintained to document and verify completion of  
538 the training on the study procedures prior to performing study related activities.

## 539 **6.2 Equipment requirements**

540 The following equipment need to be available at each center to support study  
541 activities:

- 542 • Computer with high speed internet and Windows Internet Explorer for data  
543 entry (version 6 or 8 or other compatible version)
- 544 • Market released Medtronic CareLink programmer (Model 2090 or future  
545 equivalent)
- 546 • Equipment required to complete and obtain results of an echocardiogram (if  
547 the subject has not had an echocardiogram performed within the previous 6  
548 months prior to enrollment)
- 549 • Ability to collect, process and ship blood samples to a central laboratory
- 550 • Ability to conduct an external ECG monitor of a minimum of 24 hours or able  
551 to obtain results of external ECG monitoring.

552

553 The maintenance and calibration of the equipment used for this study will be assessed by  
554 the study center (according to their standard procedures). Programmer calibration will  
555 not be monitored by the clinical investigation team, but will be maintained by Medtronic  
556 field representatives as per standard practice.

## 557 **6.3 Data collection**

558 Clinical data are collected at designated time points throughout the study. Medtronic field  
559 personnel may provide support on how to complete and/or correct data on data collection  
560 worksheets, where appropriate. Medtronic personnel are not allowed to complete or  
561 correct data collected. A web-based application tool, Remote Data Capture (RDC) will be  
562 used for data entry. This tool has Electronic Case Report Forms (e-CRFs) which can be  
563 accessed via an Internet browser. Data will be collected using an electronic data  
564 management system for clinical studies. Data will be stored in a secure, password-  
565 protected database which will be backed up on a daily basis. Data will be reviewed using  
566 programmed and manual data checks. Data queries will be made available to study

567 centers for resolution. Study management reports may be generated to monitor data  
568 quality and study progress. The investigator is responsible for the preparation (review  
569 and signature) of the e-CRF. The requirements for data collection and study visit  
570 schedules are summarized in Table 2.

571

572

573  
574

**Table 2: Data collection and study procedures**

| Study Procedure                         | Baseline Visit                                  | Implant Visit | Follow-up Office Visit | Unscheduled Visit |
|-----------------------------------------|-------------------------------------------------|---------------|------------------------|-------------------|
| Informed Consent                        | X                                               |               |                        |                   |
| Inclusion/Exclusion                     | X                                               |               |                        |                   |
| Medical History                         | X                                               |               |                        |                   |
| Subject Demographics                    | X                                               |               |                        |                   |
| Height/Weight                           | X                                               |               |                        |                   |
| HR/BP                                   | X                                               |               |                        |                   |
| Physical Exam                           | X                                               |               |                        |                   |
| Symptom assessment                      | X                                               |               | X                      | X                 |
| External ECG assessment                 | X                                               |               |                        |                   |
| Echocardiogram                          | X                                               |               |                        |                   |
| Cardiovascular medications              | X                                               | X             | X                      | X                 |
| Biomarker blood draw                    | X                                               |               |                        |                   |
| Treatment decision/actions              |                                                 |               | X                      | X                 |
| Device Location                         |                                                 | X             |                        |                   |
| Device Interrogation/data transfer      |                                                 | X             | X                      | X                 |
| QoL Questionnaire (EQ5D)                | X                                               |               | X                      |                   |
| HCU assessment                          |                                                 | X             | X                      | X                 |
| Assessment of cardiovascular procedures |                                                 |               | X                      | X                 |
| Patient conducted CareLink Transmission | Will occur monthly following Reveal ICM implant |               |                        |                   |
| Device Deficiencies                     | Upon Occurrence                                 |               |                        |                   |
| Death                                   |                                                 |               |                        |                   |
| Adverse Event                           |                                                 |               |                        |                   |
| System Modification                     |                                                 |               |                        |                   |
| Study Deviation                         |                                                 |               |                        |                   |
| Study Exit                              |                                                 |               |                        |                   |

575

576 **6.4 Patient informed consent process**

577 Patient informed consent is defined as legally effective, documented confirmation of a  
 578 subject's (or their legally authorized representative or guardian) voluntary agreement to  
 579 participate in a particular clinical investigation after information has been given to the  
 580 subject on all aspects of the clinical investigation that are relevant to the subject's decision  
 581 to participate. This process includes obtaining an ICF and an Authorization to Use and  
 582 Disclose Personal Health Information/Research Authorization/other privacy language when  
 583 required by law that has been approved by the investigation center's EC/IRB and  
 584 Medtronic, and signed and dated by the subject (or their legally authorized representative  
 585 or guardian). A subject may only consent after information has been given to the subject on  
 586 all aspects of the clinical investigation that are relevant to the subject's decision to  
 587 participate.

588 Prior to enrolling subjects, each investigational center's EC/IRB will, as required by  
589 geography approve the CIP, ICF, and the Authorization to Use and Disclose Personal  
590 Health Information/Research Authorization/other privacy language. The document(s) must  
591 be controlled (i.e. versioned and dated) to ensure it is clear which version(s) were approved  
592 by the EC/IRB. Any adaptation of the sample ICF must be approved by Medtronic and the  
593 EC/IRB reviewing the application prior to enrolling subjects. EC/IRB approval must be  
594 accompanied with and EC/IRB roster or letter of compliance.

595 Each investigational center's EC/IRB will also be required to approve subject recruitment  
596 materials and other information that will be provided to the subject.

597 Prior to initiation of any study-specific procedures, patient informed consent must be  
598 obtained from the subject (or their legally authorized representative or guardian). Likewise,  
599 privacy or health information protection regulation in other geographies may require  
600 subjects to sign and date additional forms to authorize centers to submit subject information  
601 to the study sponsor. The ICF and Authorization to Use and Disclose Personal Health  
602 Information/ Research Authorization / other privacy language as required by law must be  
603 given to the subject (or their legally authorized representative or guardian) in a language  
604 he/she is able to read and understand. The process of patient informed consent must not  
605 be conducted using coercion or undue improper influence on or inducement of the subject  
606 to participate by the investigator or other center personnel.

607

608 The process of obtaining patient informed consent shall:

- 609
- 610 • Not waive or appear to waive the subject's legal rights
  - 611 • Use language that is non-technical and understandable by the subject
  - 612 • Provide ample time for the subject to read and understand the ICF and to ask  
613 questions, receive answers and consider participation
  - 614 • Include a personally dated signature by the subject (or authorized legal  
615 representative) acknowledging that participation in the study is voluntary
  - 616 • Europe: Include a personally dated signature by the principal investigator or  
617 authorized designee responsible for conducting the informed consent process

617 If the ICF is obtained the same day the subject begins participating in study related  
618 procedures, it must be documented in the subject's case history that consent was obtained  
619 prior to participation in any study-related procedures. It is best practice for the informed  
620 consent process to be documented in the subject's case history, regardless of  
621 circumstance.

622 In the event the subject cannot read and/or write, witnessed (impartial third party) patient  
623 informed consent will be allowed, provided detailed documentation of the process is  
624 recorded in the subject's case history and the witness signs and dates the ICF patient  
625 informed consent. The subject should "make his/her mark" (sign or otherwise physically  
626 mark the document so as to indicate consent) on the ICF as well. The ICF should  
627 document the method used for communication with the prospective subject and the specific  
628 means by which the prospective subject communicated agreement to participate in the  
629 study.

630 The original or a copy of the signed and dated ICF must be filed at the study center. An  
631 original or copy of the signed and dated ICF and signed Authorization to Use and Disclose

632 Personal Health Information / Research Authorization / other privacy language as required  
633 by law must be provided to the subject. When a patient signs and dates the ICF, he/she is  
634 considered a subject enrolled in the study.

635 The ICF and Authorization to Use and Disclose Personal Health Information / Research  
636 Authorization / other privacy language as required by law must be available for monitoring  
637 and auditing. Any Medtronic Field personnel who support the implant or other study  
638 procedure must be able to review the subject's signed and dated ICF and verify its  
639 completeness prior to proceeding with the implant. In the event the Medtronic Field  
640 personnel identify ICF as being incomplete, the implant or other study procedure will not be  
641 allowed to occur until the consent of the subject can be adequately and appropriately  
642 obtained.

643 Any changes to a previously approved ICF throughout the course of the study must be  
644 approved by the EC/IRB reviewing the application and the study sponsor before being used  
645 to consent a prospective study subject. The document(s) must be controlled (i.e. versioned  
646 and and/or dated) to ensure it is clear which version(s) were approved by the EC/IRB. If  
647 new information becomes available during the course of the study that could affect  
648 subjects' future health and/or medical care, this information shall be provided to subjects in  
649 written form. If relevant, approval may be requested from subjects to confirm their  
650 continued participation.

## 651 **6.5 Enrollment and baseline**

652 When a patient signs and dates the ICF, he/she is considered a subject enrolled in the  
653 study and the patient chart is to be noted accordingly that the subject is enrolled in the  
654 study. Study-related information collection and testing may begin only after the ICF has  
655 been signed and dated.

656 The following information is required to be collected at the baseline visit:

- 657 • Informed Consent
- 658 • Inclusion/Exclusion assessment
- 659 • Demographics
- 660 • Medical history
- 661 • Physical Exam
- 662 • Symptomatology
- 663 • External ECG assessment

664 Note: If a subject has not had an external monitoring (minimum of 24 hour monitor)  
665 performed within the previous 90 days prior to enrollment, he or she must complete  
666 this test prior to Reveal ICM implant. If AF was diagnosed on the external ECG  
667 monitor the subject will be exited from the study.

- 668 • Echocardiogram

669 Note: If a subject has not had an echocardiogram performed within the previous 6  
670 months prior to enrollment, he or she must complete this test prior to Reveal ICM  
671 implant. If AF was diagnosed on the echocardiogram the subject will be exited from  
672 the study.

- 673 • Blood sample collection and analysis:
- 674 ○ Five blood tubes (one plasma, three serum and one whole blood) will be  
675 collected, processed, and sent to the central laboratory for analysis of  
676 biomarkers that are considered potential predictors of identifying patients  
677 who are at high risk for AF.
- 678 ▪ One 6 mL tube of blood will be collected and processed for plasma  
679 for B-type Natriuretic Peptide (BNP) analysis. The residual from the  
680 tube will be kept in long-term storage for future analysis.
- 681 ▪ Two 5 mL tubes of blood will be collected and processed for serum  
682 for Troponin-I, C-reactive protein (CRP), and thyroid-stimulating  
683 hormone (TSH) testing. The residuals from these three tubes will be  
684 kept in long-term storage for future analysis.
- 685 ▪ One 5 mL tube of blood will be collected, processed for serum and  
686 kept in long-term storage for future analysis.
- 687 ▪ One 4 mL tube of whole blood will be collected for genetic testing  
688 such as genotyping single nucleotide polymorphisms (SNP).
- 689 ○ Patients, who have completed their baseline visit under Version 1 CIP, will  
690 have these 5 blood samples collected at their next scheduled visit, provided  
691 consent was obtained for collection of these blood samples.
- 692 ○ Specifics regarding the acquisition of these specimens, necessary supplies,  
693 and shipping information, under separate cover, will be provided to all study  
694 centers by the central laboratory.
- 695 • QOL questionnaire: EQ-5D
- 696 • Cardiovascular medications
- 697 • Heart Rate, Blood Pressure, Height, Weight

## 698 **6.6 Implant**

699 Implantation must be performed within 6 weeks following study enrollment (dated signature  
700 of the ICF). The implant procedure will be performed in accordance with the hospital's  
701 standard implant practice and in accordance with the Medtronic Reveal ICM implant  
702 instructions (for instance, determine preferred implant site and device position with Vector  
703 Check tool, create tight subcutaneous pocket, and suture).

704 After the Reveal ICM device is implanted, the surgical team will perform diagnostic testing  
705 specific to R-wave sensing to ensure that the Reveal ICM device is accurately identifying  
706 R-waves and calculating heart rate from R-R intervals per standard implant  
707 recommendations. The programmer ECG trace with marker annotations is used to  
708 evaluate R-wave sensing and adjust gain as necessary to prevent under- or over-sensing.  
709 Ideally, this should be done at the time of implantation, and then repeated post-operatively  
710 when the study participant is awake shortly and before discharge from the hospital.

711 The following information will be collected during the implant visit:

- 712 • Reveal ICM device serial number
- 713 • Reveal ICM device implant location and orientation

- 714 • Device interrogation and data transfer (e.g. save-to-disk, USB data transfer)
- 715 • Cardiovascular medications assessment
- 716 • Healthcare utilization assessment

717

718 **6.6.1 Programming Requirements**

719

720 Table 3 below outlines the programming parameters for which there are required settings.

721

722 **Table 3: ICM device programming requirements**

| Parameter               | Required Setting     |
|-------------------------|----------------------|
| Type of AT/AF detection | AF only              |
| AF Detection            | Balanced sensitivity |
| AT/AF Record ECG of     | ≥6 minutes           |
| Ectopy Rejection        | ON                   |
| FVT ECG recording       | OFF                  |
| VT ECG recording        | OFF                  |
| Brady ECG recording     | OFF                  |
| Asystole ECG recording  | OFF                  |
| AT/AF ECG recording     | ON                   |

723

724 **6.7 Reprogramming**

725 The Reveal ICM device is to be programmed according to Table 3. Reprogramming of the  
 726 parameters that are off may be done only if needed for clinical reasons. However, they  
 727 should be reprogrammed again back to the initial settings as soon as clinically feasible and  
 728 a study deviation should be reported.

729 **6.8 Subject CareLink Transmissions**

730 Subjects are required to have their Reveal ICM interrogated monthly via CareLink  
 731 transmissions following successful Reveal ICM implant. For the monthly CareLink  
 732 transmissions that would coincide with a scheduled follow-up visit (i.e. 6-month follow-up  
 733 visit), a CareLink transmission is not required but a device interrogation and data transfer  
 734 (e.g. save-to-disk, USB data transfer) is still required at the follow-up visit.

735 CareLink transmission data will be automatically transferred to the Medtronic Data  
 736 Warehouse for CareLink. If unavailable, centers may be required to submit CareLink  
 737 reports by uploading them to a secure server or sending printed versions of the CareLink  
 738 reports to Medtronic.

739 **6.9 Scheduled follow-up visits**

740 After receiving notice of successful implantation, Medtronic will provide the target dates and  
 741 windows for each visit to the implanting center. Follow-up visits at 6 months, 12 months,  
 742 and 18 months post implant are required for all subjects. After the 18 month follow-up visit,

743 the subject will continue to have a follow-up in-office visit at 24 and 30 months or until the  
 744 last subject has completed their 18 month follow-up visit, whichever comes first. Table 4  
 745 documents the required follow-up schedule and visit windows.

746 Should a subject visit fall outside the pre-specified window, or is not performed (missing  
 747 visit), a deviation is to be reported. Data analyses will include late follow-up visits, so a late  
 748 visit is preferred over a missed visit. However, the original visit schedule must be  
 749 maintained for all subsequent follow-up visits.

750  
 751

**Table 4: Follow-up schedule and visit windows**

| Study Follow-up Visit | Window (time post-implant)       |                            |                                |
|-----------------------|----------------------------------|----------------------------|--------------------------------|
|                       | Window Start (time post-implant) | Target (time post-implant) | Window End (time post-implant) |
| Follow-up 1: 6 mo     | 152 days (22 weeks)              | 182 days (26 weeks)        | 212 days (30 weeks)            |
| Follow-up 2: 12 mo    | 334 days (48 weeks)              | 365 days (52 weeks)        | 395 days (56 weeks)            |
| Follow-up 3: 18 mo    | 516 days (74 weeks)              | 546 days (78 weeks)        | 576 days (82 weeks)            |
| Follow-up 4: 24 mo    | 700 days (100 weeks)             | 730 days (104 weeks)       | 760 days (108 weeks)           |
| Follow-up 5: 30 mo    | 881 days (126 weeks)             | 911 days (130 weeks)       | 941 days (134 weeks)           |

752

The following information will be collected during follow-up visits:

753  
 754  
 755  
 756  
 757  
 758  
 759  
 760  
 761  
 762

- Cardiovascular medications assessment
- Symptomatology
- Treatment decisions/actions taken
- QOL questionnaire: EQ-5D
- Healthcare utilization assessment
- Device interrogation
- System modifications (if applicable)
- Assessment to determine if cardiovascular related procedures (i.e. echo, treadmill stress test, chest x-ray, etc) were completed since prior visit.

763 **6.10 Unscheduled visits**

764 An unscheduled visit is defined as any unplanned visit for cardiovascular related reasons  
 765 made to the study site. Unscheduled visits will be entered onto an unscheduled visit case  
 766 report form. Data collection requirements at an unscheduled visit comprise:

767  
 768  
 769  
 770  
 771  
 772  
 773  
 774

- Cardiovascular medications assessment
- Symptomatology
- Treatment decisions/actions taken
- Healthcare utilization assessment
- Device interrogation
- System modifications (if applicable)
- Assessment to determine if cardiovascular related procedures (i.e. echo, treadmill stress test, chest x-ray, etc) were completed since prior visit



775 **6.11 Healthcare Utilization**

776 All cardiovascular-related Health Care Utilizations (including hospitalizations, emergency  
777 department visits, outpatient treatment involving overnight stay, urgent care, or outside  
778 clinic visits) will be collected and should be reported on a Health Care Utilization case  
779 report form. Note: A HCU eCRF is not to be completed for any visit made to the study  
780 center, whether the visit was for a scheduled study follow-up or an unscheduled follow up  
781 visit. For follow-up/unscheduled visits to the study center, only the follow up/unscheduled,  
782 eCRF, as appropriate, is required. Cardiovascular related Healthcare Utilization (HCU)  
783 information should be reported upon center awareness and assessed at all  
784 scheduled/unscheduled follow-up visits. Any visit where changes occur to CIP required  
785 programming parameters is considered cardiovascular-related. For HCUs involving  
786 changes to CIP required programming parameters, both an initial and final device  
787 interrogation will be required and two copies should be made, one for Medtronic and one  
788 for the subject's file.

789 **6.12 System Modification**

790 A system modification will be reported in the event that the Reveal ICM device requires  
791 invasive modification, i.e., the implanted monitor is repositioned, replaced or explanted. If  
792 the modification consists of repositioning or replacement, the follow-up schedule for the  
793 subject will remain unchanged. If the Reveal ICM is explanted without replacement prior to  
794 the 18 month follow-up, the subject will be exited from the study. If the Reveal ICM is  
795 explanted and a Medtronic IPG, ICD, or CRT device is implanted the subject can continue  
796 participation in this study (see Section 7 for handling of explanted Reveal ICM). For  
797 subjects who receive a Medtronic IPG, ICD, or CRT device and continues in the study,  
798 Table 5 outlines the recommended programming for these devices. The other parameters  
799 for these devices are to be programmed based on the investigators opinion.

800 **Table 5 Recommended programming parameters for Medtronic IPG, ICD or CRT**  
801 **devices**

| Parameter                                | Recommended Setting |
|------------------------------------------|---------------------|
| Atrial preference pacing (APP)           | OFF                 |
| Atrial rate stabilization (ARS)          | OFF                 |
| Post-mode switch overdrive pacing (PMOP) | OFF                 |
| Atrial Anti-tachycardia pacing (ATP)     | OFF                 |
| AT/AF detection and EGM collection       | Nominal             |

802

803 For a system modification the following activities are required:

- 804
- Reason(s) for modification
  - Pre-modification: device interrogation with download
  - Post-modification: device interrogation with download (if the modification involved only repositioning or explant with replacement)
  - Healthcare utilization assessment
- 805
- 806
- 807
- 808

809 **6.13 Study Exit**

810 Once a subject is enrolled every effort should be made to keep the subject in the study.  
811 Study exit of a subject before study closure and reason for subject withdrawal must be  
812 documented in the patient medical chart and on the e-CRFs. All data available through the  
813 time of the subject exit will be used for the study analyses.

814  
815 Subjects may be exited from the trial for any of the following situations:

- 816 • Subject has completed follow-up
- 817 • Subject was not successfully implanted with Reveal ICM
- 818 • Subject lost to follow-up
- 819 • Subject death
- 820 • Subject has AF or atrial flutter diagnosed via the external ECG monitoring  
821 conducted prior to Reveal ICM implant.
- 822 • Subject had Reveal ICM monitor explanted prior to 18 month follow-up and did  
823 not receive a study approved replacement
- 824 • Subject chose to withdraw (e.g., consent withdrawal, relocation to another  
825 geographic location)
- 826 • Investigator deemed withdrawal necessary (e.g., medically justified,  
827 inclusion/exclusion criteria not met, failure of subject to maintain adequate  
828 study compliance)

829 *6.13.1 Lost to follow-up*

830 If the subject is determined to be lost to follow-up, the details regarding a minimum of two  
831 attempts and the method of attempt (e.g., one letter and one phone record or two letters) to  
832 contact the subject must be documented. Any additional regulations set forth by the  
833 governing IRB or MEC must be followed.

834 *6.13.2 Subject-initiated and investigator withdrawal*

835 If the subject wishes to withdraw from the study, or the investigator deems withdrawal  
836 necessary, the center is required to document the subjects' exit and reason for withdrawal.  
837 Upon withdrawal from the study, no further study data will be collected for the subject and  
838 no additional study visits will occur. The subject will continue to receive standard medical  
839 care comparable to what he or she would have received had Reveal ICM been implanted  
840 without being enrolled in a study.

841 *6.13.3 Study exit upon sponsor request*

842 In the event that study exit occurs upon sponsor request, no further study data will be  
843 collected for the subject and no additional study visits will occur. The subject will continue  
844 to receive standard medical care comparable to what he or she would have received had  
845 the Reveal ICM been implanted without being enrolled in a study.

846 **6.14 Medications**

847 Information on cardiovascular medications will be collected at the baseline visit and  
848 throughout the follow-up visits for the subject. Also, information regarding medications  
849 given for non-cardiac disorders that may, in the investigator's opinion, affect heart rate

850 (e.g., a beta adrenergic antagonist administered topically to treat glaucoma) will be  
851 collected.

852 No specific medications are required for the study. The only medications that are excluded  
853 from use during the study would be investigational medications.

## 7.4 **DEVICE STORAGE, HANDLING AND TRACEABILITY**

855  
856 The Reveal ICM system used in this study is commercially available (no investigational  
857 components). There are no additional instructions for storage, use and handling for the  
858 Reveal ICM system components than the ones covered in the product manuals that are  
859 packaged with the devices. No traceability of the Reveal ICM is required.

### 860 **7.1 Final product disposition**

861 It is not a study requirement to return explanted devices to Medtronic. However, any  
862 Reveal ICM that is explanted due to device adverse effects or device malfunction should be  
863 returned to Medtronic for analysis. Similarly, if the subject dies during the study, explant of  
864 the Reveal ICM and its return to Medtronic for analysis is recommended, if local laws  
865 permit this. Prior to explant, the device should be interrogated and data downloaded or a  
866 CareLink transmission performed, if at all possible.

867 When the Reveal ICM or other system component is returned to Medtronic, internal product  
868 reporting systems may be used to gather additional information about the returned item.  
869 To receive a Returned Product Mailer Kit, contact your local Medtronic field personnel or  
870 the REVEAL AF Clinical Trial Leader.

## 8.1 **STUDY DEVIATIONS**

872 A study deviation is defined as a situation or event within a study that represents non-  
873 compliance with the CIP, or non-compliance with other study documents such as the CTA.  
874 The investigator should contact Medtronic in situations where the investigator anticipates or  
875 contemplates a decision to deviate. The investigator should also contact Medtronic to  
876 discuss circumstances in which a deviation will apply to all visits going forward, and if so to  
877 determine if it is appropriate to capture such circumstances in a single deviation report.  
878 Such circumstances might be a medically justifiable condition, or other unforeseen  
879 situations that will continue (e.g. subject permanently refusing a specific, but non-essential  
880 (not contributing to primary endpoint) measurement or procedure).

881 The investigator does not need to contact Medtronic when a deviation from the CIP is  
882 necessary to protect the safety, rights or physical well-being of a subject in an emergency  
883 or for non-emergency situations that are both unforeseen and beyond the investigator's  
884 control (e.g. subject failure to attend scheduled follow-up visits, inadvertent loss of data  
885 due to computer malfunction, inability to perform required procedures due to subject  
886 illness).

887 All study deviations must be reported on the Study Deviation CRF independent of the  
888 reason for the deviation (i.e. whether medically justifiable, an inadvertent occurrence, or  
889 whether taken to protect the subject in an emergency). The deviation must be recorded  
890 with an explanation for its occurrence.

891 Medtronic is responsible for analyzing deviations, assessing their significance, and  
892 identifying any additional corrective and/or preventive actions (e.g. initiating an amendment  
893 to the CIP, conducting additional training). Repetitive or serious investigator compliance  
894 issues may represent a need to initiate a corrective action plan with the investigator and  
895 site, and in some cases, necessitate freezing enrollment until the problem is resolved, or  
896 terminating the investigator's participation in the study.

## 897 **8.1 Reporting timelines**

898 In the event the deviation involves a failure to obtain a subject's consent, or is made to  
899 protect the life or physical well-being of a subject in an emergency, the deviation must be  
900 reported to Medtronic and to the IRB/MEC within the time required by IRB/MEC policies,  
901 local laws and/or the local supervising regulatory agency. For all other study deviations, it  
902 is expected that reporting to Medtronic will occur as soon as possible after the center  
903 becomes aware that the deviation has occurred. On a periodic basis, Medtronic will  
904 provide center-specific reports to investigators that will summarize information about all the  
905 various deviations that have occurred at the investigational site.

## 906 **9. ADVERSE EVENTS AND DEVICE DEFICIENCIES**

907 Timely, accurate, and complete reporting and analysis of safety information for clinical  
908 studies are crucial for the protection of subjects, investigators and the sponsor. Reporting  
909 and analysis of safety data are mandated by regulatory authorities worldwide. Medtronic  
910 has established procedures in conformity with worldwide regulatory requirements to ensure  
911 appropriate reporting of safety information. This study is conducted in accordance with  
912 these procedures and regulations.

913 Since the safety reporting requirements and classification systems vary for each regulatory  
914 agency, requirements from all geographies are taken into account for the collection and  
915 reporting of safety information.

### 916 **9.1 Adverse Event (AE) and Device Deficiency Assessment**

#### 917 *9.1.1 Adverse Events*

918 All cardiovascular-related adverse events as well as all serious adverse events (SAEs) will  
919 be collected throughout the study duration, beginning at the time that the ICF is signed and  
920 dated. Retrospective reporting of SAE's must be performed for subjects enrolled under the  
921 previous version of the CIP. These events will be reported to Medtronic on an Adverse  
922 Event electronic case report form (e-CRF).

923 Each reportable AE must be reported separately and will include a description of the event,  
924 the diagnosis, the date of event onset, the date the site became aware of the event,  
925 seriousness of the event, diagnostic tests and procedures performed, actions taken as a  
926 result of the event, relatedness of the event, and the outcome of the event.

927 The completed eCRF must be sent to Medtronic per the reporting timelines in Section 9.5.

928 In case the AE is related to the market approved device during the study, post market  
929 surveillance is also applicable and the investigator is responsible for immediate reporting of  
930 the product complaint via the regular channels for market released products.

#### 931 *9.1.2 Device Deficiencies*

932 Device deficiency information will be collected throughout the study and reported to  
 933 Medtronic. A Device Deficiency is an inadequacy of a medical device with respect to its  
 934 identity, quality, durability, reliability, safety or performance. *NOTE: Device Deficiencies*  
 935 *include malfunctions, use errors, and inadequate labeling.* A Device Deficiency that did not  
 936 lead to a reportable AE should be reported as a Device Deficiency only. Retrospective  
 937 reporting of Device deficiencies must be performed for subjects enrolled under the previous  
 938 version of the CIP.

939 Device deficiencies that did not lead to an AE but could have led to a Serious Adverse  
 940 Device Effect (SADE) (i.e., if suitable action had not been taken, if intervention had not  
 941 been made, or if the circumstances had been less fortunate) require immediate reporting  
 942 (refer to section 9.5 for reporting requirements).

943 *9.1.2 Processing Updates and Resolution*

944 For any changes in the status of a previously reported AE (i.e. change in actions taken,  
 945 change in outcome, change in relatedness), an update to the original AE must be reported.  
 946 All AEs must be followed until the AE has been resolved, is unresolved with no further  
 947 actions planned, subject exit/death, or until study closure, whichever occurs first.

948  
 949 At the time of study exit, all AEs with an outcome of “Unresolved, further actions or  
 950 treatment planned” must be reviewed and an update to the original AE must be reported.  
 951 At a minimum, if there are no changes to the description, test and procedures or actions  
 952 taken, the outcome must be updated to reflect “Unresolved at time of study exit / death /  
 953 study closure.”

954 **9.2 Adverse Event definitions, classification and reporting**

955 *9.2.1 Adverse Event Definitions*

956  
 957  
 958

**Table 6: Adverse Event definitions**

| <b>General</b>     |                                                                                                                                                                                                                                                                                                                                                                                                                                                                                                                                                                                    |
|--------------------|------------------------------------------------------------------------------------------------------------------------------------------------------------------------------------------------------------------------------------------------------------------------------------------------------------------------------------------------------------------------------------------------------------------------------------------------------------------------------------------------------------------------------------------------------------------------------------|
| Adverse Event (AE) | <p>Any untoward medical occurrence, intended disease or injury, or untoward clinical signs (including abnormal laboratory findings) in subjects, users or other persons, whether or not related to the investigational medical device.</p> <p>– NOTE 1: This definition includes events related to the investigational medical device or the comparator.</p> <p>– NOTE 2: This definition includes events related to the procedures involved.</p> <p>– NOTE 3: For users or other persons, this definition is restricted to events related to investigational medical devices.</p> |

|                                      |                                                                                                                                                                                                                                                                                                                                                                                                                                                                                                                                                                                                                                                                                                                                                                                                                     |
|--------------------------------------|---------------------------------------------------------------------------------------------------------------------------------------------------------------------------------------------------------------------------------------------------------------------------------------------------------------------------------------------------------------------------------------------------------------------------------------------------------------------------------------------------------------------------------------------------------------------------------------------------------------------------------------------------------------------------------------------------------------------------------------------------------------------------------------------------------------------|
| Adverse Device Effect (ADE)          | Adverse event related to the use of an investigational medical device<br>NOTE 1: This definition includes adverse events resulting from insufficient or inadequate instructions for use, deployment, implantation, installation, or operation, or any malfunction of the investigational medical device.<br>NOTE 2: This definition includes any event resulting from use error or from intentional misuse of the investigational medical device.                                                                                                                                                                                                                                                                                                                                                                   |
| Device Deficiency (DD)               | Inadequacy of a medical device with respect to its identity, quality, durability, reliability, safety or performance<br>NOTE: Device deficiencies include malfunctions, use errors, and inadequate labeling.                                                                                                                                                                                                                                                                                                                                                                                                                                                                                                                                                                                                        |
| <b>Seriousness</b>                   |                                                                                                                                                                                                                                                                                                                                                                                                                                                                                                                                                                                                                                                                                                                                                                                                                     |
| Serious Adverse Event (SAE)          | adverse event that<br>a) led to death<br>b) led to a serious deterioration in the health of the subject, that either resulted in <ul style="list-style-type: none"> <li>• a life-threatening illness or injury, or</li> <li>• a permanent impairment of a body structure or a body function, or</li> <li>• in-patient hospitalization or prolonged hospitalization, or</li> <li>• medical or surgical intervention to prevent life-threatening illness or injury or permanent impairment to a body structure or a body function,</li> </ul> c) led to fetal distress, fetal death or a congenital abnormality or birth defect.<br>NOTE Planned hospitalization for a pre-existing condition, or a procedure required by the CIP, without serious deterioration in health, is not considered a serious adverse event |
| Serious Adverse Device Effect (SADE) | Adverse device effect that has resulted in any of the consequences characteristic of a serious adverse event.                                                                                                                                                                                                                                                                                                                                                                                                                                                                                                                                                                                                                                                                                                       |
| <b>Relatedness</b>                   |                                                                                                                                                                                                                                                                                                                                                                                                                                                                                                                                                                                                                                                                                                                                                                                                                     |
| Cardiovascular Related               | An adverse event relating to the heart and the blood vessels or the circulation. This includes all arrhythmias, strokes, TIAs, etc.                                                                                                                                                                                                                                                                                                                                                                                                                                                                                                                                                                                                                                                                                 |

959 *9.2.2 Adverse Event and Device Deficiency classification and reporting*

960 Upon receipt of AEs at Medtronic, a Medtronic representative will review the AE for  
961 completeness and accuracy and when necessary will request clarification and/or additional  
962 information from the Investigator. Medtronic will utilize MedDRA, the Medical Dictionary for  
963 Regulatory Activities, to assign a medical term for each AE based on the information  
964 provided by the investigator.

965

966 Regulatory reporting of AEs and device deficiencies that could have led to an SADE will be  
967 completed according to local regulatory requirements. Refer to Table 9 for a list of required  
968 investigator and Medtronic reporting requirements and timeframes. It is the responsibility of  
969 the investigator to comply with any additional AE reporting requirements set by the local  
970 EC/IRB responsible for oversight of the study.

971 AEs will be classified as outlined below:

972

973

**Table 7: Adverse Event classification responsibilities**

| What is classified? | Who classifies? | Classification Parameters                                        |
|---------------------|-----------------|------------------------------------------------------------------|
| Severity            | Investigator    | seriousness                                                      |
| Diagnosis           | Investigator    | Based on presenting signs and symptoms and other supporting data |
|                     | Sponsor         | MedDRA term assigned based on the data provided by Investigator  |

974

### 975 **9.3 Subject death**

#### 976 *9.3.1 Death data collection*

977 All subject deaths must be reported by the investigator to Medtronic as soon as the  
978 investigator first learns of the death using a Death e-CRF. The Reveal ICM should, if  
979 possible, be explanted and returned to Medtronic for analysis if permitted by local laws.

980 If possible, prior to explant, the Reveal ICM should be interrogated, and the data  
981 downloaded. If any system component is returned to Medtronic, internal return product  
982 reporting systems may be used to gather additional information about the returned  
983 device/component.

984 In summary, the following data will be collected:

- 985 • Date of death
- 986 • Detailed description of death
- 987 • Cause of death
- 988 • Relatedness to device system and/or procedure
- 989 • Device interrogation(if possible)
- 990 • Device disposition information

#### 991 *9.3.2 Death classification and reporting*

992 Sufficient information will be required in order to properly classify a subject death. The  
993 Investigator shall classify each subject death in accordance with the following definitions:

994 Cardiac Death: A death directly related to the electrical or mechanical dysfunction of the  
995 heart.

996 Sudden Cardiac Death (SCD): Natural death due to cardiac causes, preceded by  
997 abrupt loss of consciousness occurring within one hour of the onset of acute  
998 symptoms. Preexisting heart disease may have been known to be present, but the  
999 time and mode of death are unexpected. If time of onset cannot be determined,  
1000 SCD will alternatively be defined as any unexpected cardiac death occurring out of  
1001 the hospital or in the emergency room as dead on arrival.

1002 Non-sudden Cardiac Death: All cardiac deaths that are not classified as sudden  
1003 deaths, including all cardiac deaths of hospitalized subjects on inotropic support.

1004 Non-cardiac Death: A death not classified as a cardiac death.

1005 Unknown Death Classification: Unknown death classification is intended for use only when  
1006 there is insufficient or inadequate information to classify the death.

1007 **Table 8: Subject death classification responsibilities**

| What is classified?  | Who classifies? | Classification Parameters                                         |
|----------------------|-----------------|-------------------------------------------------------------------|
| Relatedness          | Investigator    | Reveal ICM system or procedure                                    |
| Death Classification | Investigator    | Cardiac, Sudden Cardiac, Non-sudden Cardiac, Non-cardiac, Unknown |

1008

1009 Regulatory reporting of subject deaths will be completed according to local regulatory  
1010 requirements. Refer to Table 9 for a list of required investigator and sponsor reporting  
1011 requirements and timeframes.

## 1012 **9.4 Market-released reporting requirements**

1013 All devices used in this study are market released. It is the responsibility of the investigator  
1014 to report all product complaints and malfunctions immediately via the regular channels for  
1015 market approved, CE marked products. The reporting of product complaints and  
1016 malfunctions is not part of the clinical study and should be done in addition to the Adverse  
1017 Event reporting requirements.

1018

1019 9.4.1 Europe:

1020

1021 **Product Complaint:** Any written, electronic or oral communication that alleges  
1022 deficiencies related to the identity, quality, durability, reliability, safety, effectiveness or  
1023 performance of a device after it is released for distribution.

1024

1025 **Incident:** Any malfunction or deterioration in the characteristics and/or performance of a  
1026 device, as well as any inadequacy in the labeling or the instructions for use which, directly  
1027 or indirectly, might lead to or might have led to the death of a patient, or user or of other  
1028 persons or to a serious deterioration in their state of health. Any technical or medical  
1029 reason resulting in withdrawal of a device from the market by the manufacturer.

1030

1031 A serious deterioration in the state of health can include:

1032

- 1033 1. Life-threatening illness
- 1034 2. Permanent impairment of a body function or permanent damage to a body structure
- 1035 3. A condition necessitating medical or surgical intervention to prevent a) or b)
- 1036 4. Any indirect harm as a consequence of an incorrect diagnostic or in vitro diagnostic test  
1037 results when used within manufacturer's instructions for use
- 1038 5. Fetal distress, fetal death or any congenital abnormality or birth defects

1038

1039 **Note:** Not all incidents lead to death or serious deterioration in health. The non-occurrence  
1040 of such a result might have been due to other fortunate circumstances or to the intervention  
1041 of healthcare personnel. It is sufficient that: an incident associated with a device happened,  
1042 and the incident was such that, if it occurred again, it might lead to death or serious  
1043 deterioration in health.

1044



1045 **Vigilance Reporting:** A system used to notify the Competent Authority (CA) about  
 1046 incidents with regard to medical devices that carry the CE-mark. This system requires a  
 1047 manufacturer to notify the CA of incidents immediately upon learning of them (ref:  
 1048 MEDDEV 2.12-1 rev 5 (Guidelines on a Medical Device Vigilance System), April 2007)"

1049  
 1050 9.4.2 United States:

1051  
 1052 **Medical Device Reporting (MDR) Requirements for User Facilities**  
 1053 General Reminder for Investigators:

1054  
 1055 Per FDA regulations, Device User Facilities are required to report Medical Device Reports  
 1056 (MDR) on market approved products (21 CFR 803, subpart C) A Device User Facility is  
 1057 defined as a hospital, an ambulatory surgical facility, a nursing home, an outpatient  
 1058 treatment facility, or an outpatient diagnostic facility which is not a physician's office.

1059 **9.5 Adverse Event and Device Deficiency records and reporting**  
 1060 **requirements**

1061 Adverse Events will be recorded and reported according to local regulatory requirements.  
 1062 Refer to Table 9 for adverse event reporting requirements. It is the responsibility of the  
 1063 Investigator to abide by the adverse event reporting requirements stipulated by the centers'  
 1064 EC/IRB.

1065 The investigator is required to report these events to Medtronic as noted in Table 9, and to  
 1066 the EC/IRB per local requirements. Medtronic is also required to report these events to the  
 1067 local competent authority based on their requirements

1068  
 1069

**Table 9: Adverse Event Reporting Requirements**

| <b>Serious Adverse Events (SAEs)</b>                                           |                                                                                                                                                                                                                     |
|--------------------------------------------------------------------------------|---------------------------------------------------------------------------------------------------------------------------------------------------------------------------------------------------------------------|
| <b>Investigator submit to:</b>                                                 |                                                                                                                                                                                                                     |
| Medtronic                                                                      | <b>Europe:</b> Immediately after the investigator first learns of the event. (ISO 14155 and local law)<br><b>All other geographies:</b> Submit in a timely manner after the investigator first learns of the event. |
| EC/IRB                                                                         | <b>Europe:</b> Submit to EC/IRB per local reporting requirement<br><b>All other geographies:</b> Submit per local EC requirement.                                                                                   |
| <b>Sponsor submit to:</b>                                                      |                                                                                                                                                                                                                     |
| Regulatory authorities                                                         | <b>Europe:</b> Submit to Competent Authority per local reporting requirement.                                                                                                                                       |
| EC/IRB                                                                         | <b>Europe:</b> Submit to EC/IRB per local reporting requirement.                                                                                                                                                    |
| <b>All other reportable Adverse Events (cardiovascular-related) and Deaths</b> |                                                                                                                                                                                                                     |
| <b>Investigator submit to:</b>                                                 |                                                                                                                                                                                                                     |
| Medtronic                                                                      | <b>All geographies:</b> Submit in a timely manner after the investigator first learns of the event.                                                                                                                 |
| Regulatory authorities                                                         | <b>All geographies:</b> Submit or report as required per local reporting requirement.                                                                                                                               |
| EC/IRB                                                                         | <b>All geographies:</b> Submit per local EC/IRB requirement.                                                                                                                                                        |

|                                                |                                                                                                                                                                                                                                                         |
|------------------------------------------------|---------------------------------------------------------------------------------------------------------------------------------------------------------------------------------------------------------------------------------------------------------|
| <b>Sponsor submit to:</b>                      |                                                                                                                                                                                                                                                         |
| Regulatory authorities                         | <b>Europe:</b> Submit to Competent Authority per local reporting requirement, as applicable                                                                                                                                                             |
| EC/IRB                                         | <b>Europe:</b> Submit to EC/IRB per local reporting requirement.                                                                                                                                                                                        |
| <b>Device Deficiencies with SADE potential</b> |                                                                                                                                                                                                                                                         |
| <b>Investigator submit to:</b>                 |                                                                                                                                                                                                                                                         |
| Medtronic                                      | <b>Europe:</b> Immediately after the investigator first learns of the deficiency or of new information in relation with an already reported deficiency.<br><b>All other geographies:</b> Submit or report as required per local reporting requirements. |
| Ethics Board                                   | Submit per local EC requirement.                                                                                                                                                                                                                        |
| Regulatory authorities                         | Report immediately after the investigator first learns of the event if required according to local law.                                                                                                                                                 |
| <b>Sponsor submit to:</b>                      |                                                                                                                                                                                                                                                         |
| Regulatory authorities                         | <b>All geographies:</b> Submit or report as required per local reporting requirements.                                                                                                                                                                  |
| Ethics Board                                   | <b>All geographies:</b> Submit per local Ethics Board requirement.                                                                                                                                                                                      |
| <b>All other Device Deficiencies</b>           |                                                                                                                                                                                                                                                         |
| <b>Investigator submit to:</b>                 |                                                                                                                                                                                                                                                         |
| Medtronic                                      | <b>All geographies:</b> Submit in a timely manner after the investigator first learns of the deficiency.                                                                                                                                                |
| Regulatory Authorities                         | <b>All geographies:</b> Submit or report as required per local reporting requirement.                                                                                                                                                                   |
| EC                                             | <b>All geographies:</b> Submit per local EC requirement.                                                                                                                                                                                                |

1070

## 10. RISK ANALYSIS

1072 Medtronic follows rigorous Quality Assurance and Control procedures throughout the life of  
1073 a product, from the business analysis phase through development, market release, and  
1074 post-market surveillance. All the equipment and the implantable devices in the REVEAL AF  
1075 study are market-released in all participating countries (for instance, FDA approved for  
1076 USA, and CE mark for Europe) and are used in accordance with medical, technical, and  
1077 ethical standards and in accordance with their approved and intended use. There are no  
1078 incremental risks introduced to the subject as a result of participation in the REVEAL AF  
1079 study. Devices should be handled according to the Clinical Manual.

1080 There are potential risks and discomforts associated with receiving a subcutaneous  
1081 insertable cardiac monitor. Standard risks as described in the Reveal ICM Clinician Manual  
1082 are:

- 1083
- 1084 • Device rejection phenomena including local tissue reaction
- 1085 • Device migration
- 1086 • Pocket infection and erosion through the skin
- 1087

1088 The risks identified above will be minimized by careful assessment of each subject prior to,  
1089 during, and after implant of the Reveal ICM.

1090 **10.1 Risk Minimization**

1091 The potential risks associated with the Reveal ICM system have been identified and  
1092 mitigated. Any potential risks associated with this study are minimized by selecting qualified  
1093 investigators and training study personnel on the CIP.

1094 Risks will be minimized by careful assessment of each subject prior to, during, and after  
1095 implant of the Reveal ICM. Medtronic has also attempted to minimize risk to subjects by  
1096 ensuring the investigators will be involved with the diagnosis, referral for implant (as  
1097 necessary), the implant and follow-up of the subjects implanted with the Reveal ICM  
1098 system. Prior to implant, it is recommended subjects undergo a complete cardiac  
1099 evaluation.

1100 Medtronic has further minimized the possibility of risks by implementing and maintaining  
1101 quality control measures into device production, providing guidelines for subject selection  
1102 and evaluation, and providing appropriate and adequate instructions and labeling.

1103 After implantation, subjects in the Reveal AF clinical study will be followed at regular  
1104 intervals to monitor the condition of the implanted system. At each CIP required in office  
1105 follow-up, the investigator must interrogate the Reveal ICM device to verify appropriate  
1106 function, evaluate sensing characteristics, and to determine if there are any adverse  
1107 events.

1108 **10.2 Potential Benefits**

1109 Participation in the REVEAL AF study may offer no direct personal benefit to individual  
1110 subjects. Subjects may benefit from continuous ECG monitoring with the Reveal ICM, as  
1111 this monitoring could result in diagnosis of AF (or other arrhythmias) and comprehensive  
1112 evaluation of symptoms on an earlier and more conclusive basis than what would be  
1113 possible without an implantable monitor. Subjects may also benefit from being evaluated in-  
1114 office at 6 month intervals as required by the study visit schedule.

1115 The information gained from this study could result in the improved management of AF in  
1116 individuals who are at high risk for stroke. Additionally, information collected from this  
1117 study may assist in the design of new product(s)/therapy(ies) and/or instructions for use.

1118 **10.3 Risk-to-Benefit Analysis**

1119 Since the Reveal ICM device is a market-released (FDA approved for USA and CE mark  
1120 for Europe) device used in accordance with its approved and intended use, the risks  
1121 associated with the device are the same as would be the case if the subject received the  
1122 device outside the study context. There are no additional tests or assessments required  
1123 that add risks compared to standard of care. The study requirements for careful selection,  
1124 training, and monitoring of the participating physician and for detailed in-office evaluation of  
1125 the subject at 6 month intervals carry potential benefits that might not be present if the  
1126 subject received the device without participating in the study. Hence, for individual  
1127 subjects, participation in the study has greater benefit than risk. Moreover, the value of the  
1128 knowledge to be gained by conducting this clinical study outweighs the potential risks to  
1129 study participants.

## 11. PLANNED STUDY CLOSURE, EARLY TERMINATION OF STUDY OR STUDY SUSPENSION

### 11.1 Planned study closure

Study closure is a process initiated by distribution of an initial study closure letter. Study closure is defined as closure of a clinical study that occurs when Medtronic and/or regulatory requirements have been satisfied per the CIP and/or by a decision by Medtronic or regulatory authority, whichever occurs first. Continued IRB/MEC oversight is required until the overall study closure process is complete. The study closure process is complete upon distribution of the Final Report or after final payments. With regard to individual subjects, no dedicated closure visit will occur in association with overall study closure, and no medical care as defined by the study will be provided to the subject following overall study closure.

### 11.2 Early termination or suspension

Early termination of the study is the closure of a clinical study that occurs prior to meeting defined endpoints. This is possible for the whole study, or for a single study center.

Study suspension is a temporary postponement of study activities related to enrollment and distribution of the product. This is possible for the whole study or a single center.

#### 11.2.1 Study-wide termination or suspension

Possible reasons for considering study suspension or termination of the study include but are not limited to:

- Observed/suspected performance different from the product's design intent
- Decision by Medtronic or by a regulatory body
- Technical issues during the manufacturing process

#### 11.2.2 Investigator/center termination or suspension

Possible reasons for clinical investigator or center termination or suspension include but are not limited to:

- Failure to obtain initial MEC/IRB/Head of Medical Institution approval or annual renewal of the study
- Persistent non-compliance with the CIP (e.g. failure to adhere to inclusion/exclusion criteria, failure to follow subjects per scheduled follow-ups)
- Lack of enrollment
- Noncompliance to regulations or to the terms of the CTA (e.g. failure to submit data in a timely manner, failure to follow-up on data queries and monitoring findings in a timely manner, etc.)
- IRB/ MEC suspension of the center
- Fraud or fraudulent misconduct is discovered (as defined by local law or regulations)
- Investigator request (e.g. no longer able to support the study)

1168 **11.3 Procedures for termination or suspension**

1169

1170 If the termination or suspension is initiated by Medtronic, by an investigator, or by an  
1171 EC/IRB, Medtronic will inform the regulatory authority(ies) where by local geography.

1172 *11.3.1 Medtronic-initiated*

- 1173 • In the case of study termination or suspension for reasons other than a  
1174 temporary MEC/IRB approval lapse, the investigator will promptly inform the  
1175 MEC/IRB.
- 1176 • In the case of study termination, the investigator must inform the subjects and  
1177 may inform the personal physician of the subjects to ensure appropriate care  
1178 and follow-up is provided
- 1179 • In the case of a study suspension, subject enrollment must stop until the  
1180 suspension is lifted by Medtronic
- 1181 • In the case of a study suspension, enrolled subjects should continue to be  
1182 followed out of consideration of their safety, rights and welfare

1183 *11.3.2 Investigator-initiated*

- 1184 • The investigator will inform Medtronic and provide a detailed written  
1185 explanation of the termination or suspension
- 1186 • The investigator will promptly inform the institution (where required per  
1187 regulatory requirements)
- 1188 • The investigator will promptly inform the MEC/IRB.
- 1189 • The investigator will promptly inform the subjects and/or the personal  
1190 physician of the subjects to ensure that appropriate care and follow-up is  
1191 provided
- 1192 • In the case of a study suspension, subjects enrolled should continue to be  
1193 followed out of consideration of their safety, rights and welfare

1194 *11.3.3 EC/IRB committee-initiated*

- 1195 • The investigator will inform Medtronic and provide a detailed written  
1196 explanation of the termination or suspension within 5 business days
- 1197 • Subject enrollment must stop until the suspension is lifted
- 1198 • Subjects already enrolled should continue to be followed in accordance with  
1199 MEC/IRB policy or its determination that an overriding safety concern or  
1200 ethical issue is involved
- 1201 • The investigator will inform his/her institution (where required per local  
1202 requirements)
- 1203 • The investigator will promptly inform the subjects, or legally-authorized  
1204 designees or guardians and/or the personal physician of the subjects, with the  
1205 rationale for the study termination or suspension

1206

## 12. STATISTICAL METHODS AND DATA ANALYSIS

1208

### 1209 12.1 Primary Objective

1210 Determine the incidence rate of AF lasting greater than or equal to six minutes in  
1211 patients who are at high risk of having AF.

#### 1212 12.1.1 Hypothesis

1213 The purpose of the objective is to estimate the incidence of AF in this patient  
1214 population, and thus no pre-specified hypotheses will be tested.

#### 1215 12.1.2 Endpoint Definition

1216 AF will be defined as an arrhythmic episode lasting at least 6 minutes in duration  
1217 and adjudicated to be AF.

#### 1218 12.1.3 Performance Requirements

1219 A 95% two-sided confidence interval will be generated for the 18 month event rate.  
1220 There is no pre-specified threshold for success.

#### 1221 12.1.4 Rationale for Performance Criteria

1222 Because the rate of AF is unknown in this population, the purpose of this objective  
1223 is simply to estimate what the incidence rate over 18 months is for this population.  
1224 Thus, a threshold for success is not necessary for this objective.

#### 1225 12.1.5 Sample Size Determination

1226 The sample size requirement for this objective was chosen to generate a 95%  
1227 two-sided confidence interval for the 18 month incidence rate of AF that would be  
1228 approximately 10 percentage points in width. To assess the sample size  
1229 requirement, data from a subset of the CONNECT study subjects comparable to  
1230 the target population (ICD subjects with no history of AF or stroke but possessing  
1231 a CHADS score of at least 3 or of 2 along with coronary artery disease) was used  
1232 to estimate the likely incidence rate in this population. CONNECT study subjects  
1233 were only followed through 15 months, but based on the available data the  
1234 extrapolated 18 month event rate was estimated to be between 16% and 20%.  
1235 Assuming an event rate of 20% at 18 months and 10% attrition per year, a sample  
1236 size of 292 would ensure an 80% chance of generating a confidence interval with  
1237 10% width (i.e., 14.4% to 24.4%). However, due to the secondary goal of  
1238 identifying a subset of high risk patients most likely to have undiagnosed AF, it is  
1239 desirable to allow for greater representation of the underlying population by using  
1240 a sample of up to 400 patients implanted. Given it is expected that approximately  
1241 5-10% of the subjects enrolled in the study will have AF detected via external ECG  
1242 monitoring, up to 450 subjects will be enrolled in the study.

#### 1243 12.1.6 Analysis Methods

1244 Arrhythmic episodes identified by the device as AF and lasting 6 or more minutes  
1245 will be stored by the device with EGM data, so that the episodes can be  
1246 adjudicated to confirm they are truly AF. The time to first such episode with EGM

1247 data available will be determined for each subject. If a subject does not  
1248 experience an endpoint during follow-up, the subject will be censored at the date  
1249 of their last device interrogation. Time 0 will be the date of device implant. A  
1250 Kaplan-Meier event curve will be generated, along with 95% confidence bounds.  
1251 Only adjudicated AF episodes will be included for analysis.

#### 1252 12.1.7 Determination of Subjects/Data for Analysis

1253 Subjects who were successfully implanted with the Reveal ICM will be included in  
1254 the analysis cohort. For those subjects who do not complete follow-up or receive a  
1255 Medtronic IPG, ICD, or CRT during the course of the study, the analysis will include  
1256 all data up to the point of their last useable interrogation. However, subjects will be  
1257 excluded from analysis based on the following CIP violations that would affect  
1258 endpoint analysis:

- 1259 • Subject had AF prior to the Reveal ICM implant
- 1260 • Subject did not satisfy the CHADS<sub>2</sub> score inclusion criterion at time of study  
1261 enrollment
- 1262 • Subject was taking an anti-arrhythmic medication at time of enrollment

### 1263 12.2 Secondary Objective #1: Predictors of AF

#### 1264 12.2.1 Identify predictors of AF onset in patients who are at high risk of having AF

##### 1265 Hypothesis

1266 Let  $h_0(t)$  denote the hazard rate for patients at high risk of AF developing AF.  
1267 Consider a set of baseline characteristics  $X_1, X_2 \dots$ . It is assumed that if these  
1268 particular characteristics affect a patient's risk of developing AF, the effects have  
1269 the form

$$1270 h(t) = h_0(t)\exp(\beta_1 X_1 + \beta_2 X_2 + \dots)$$

1271 The null hypothesis is that these covariates have no effect on a patient's risk of  
1272 developing persistent AF. In other words,

1273  $H_0: \beta_i = 0$  for all  $i$

1274  $H_A: \beta_i \neq 0$  for some  $i$

#### 1275 12.2.2 Endpoint Definition

1276 AF will be defined as an arrhythmic episode lasting at least 6 minutes in duration  
1277 and adjudicated to be AF.

#### 1278 12.2.3 Performance Requirements

1279 The null hypothesis will be rejected if the p-value for any of the covariates listed in  
1280 section 12.2.5 is less than 0.05.

#### 1281 12.2.4 Sample Size Determination

1282 Based on the data from the CONNECT trial, it is assumed that approximately 16 to  
1283 20% of subjects will experience an AF event in their first 18 months of follow-up.  
1284 Assume there is a single baseline comorbidity which divided patients into those  
1285 with a lower prevalence of AF (e.g. 7-11% chance of experiencing AF in the first  
1286 18 months of having an ILR) and those with higher prevalence of AF (e.g. 22%

1287 chance of experiencing AF in the first 18 months of having an ILR). Under this  
 1288 assumption and the assumption of 10% attrition per year, the following table  
 1289 provides power estimates for the comorbidity being shown to be significant in  
 1290 affecting the risk of experiencing AF, 400 total implanted subjects. In addition, it is  
 1291 expected that approximately 5-10% of the subjects enrolled in the study will have  
 1292 AF detected via external ECG monitoring; therefore, up to 450 subjects will be  
 1293 enrolled in the study.

1294  
 1295

**Table 10: Power Calculations for Predictor Objective Assuming 10% Annual Attrition**

| <b>Cohort Sample Size</b> | <b>Fraction of Cohort With Comorbidity</b> | <b>18 Month Event-free Rate with Comorbidity</b> | <b>18 Month Event-free Rate without Comorbidity</b> | <b>Power for detecting significant difference</b> |
|---------------------------|--------------------------------------------|--------------------------------------------------|-----------------------------------------------------|---------------------------------------------------|
| 400                       | 25%                                        | 78%                                              | 88%                                                 | 78.9%                                             |
| 400                       | 30%                                        | 78%                                              | 88%                                                 | 78.5%                                             |
| 400                       | 35%                                        | 78%                                              | 88%                                                 | 82.6%                                             |
| 400                       | 45%                                        | 78%                                              | 88%                                                 | 84.4%                                             |
| 400                       | 25%                                        | 78%                                              | 90%                                                 | 90.1%                                             |
| 400                       | 35%                                        | 78%                                              | 90%                                                 | 94.5%                                             |

1296

1297 *12.2.5 Analysis Methods*

1298 The following baseline measurements will be evaluated in testing for predictors of  
 1299 persistent AF:

- 1300 • Diabetes
- 1301 • Heart Failure
- 1302 • Age
- 1303 • Hypertension
- 1304 • Renal impairment
- 1305 • COPD
- 1306 • BMI
- 1307 • BNP
- 1308 • C-reactive protein
- 1309 • Troponin-I
- 1310 • TSH
- 1311 • Prior stroke occurring >1 year ago
- 1312 • Coronary artery disease
- 1313 • Sleep apnea
- 1314 • Family History
- 1315 • Vascular disease
- 1316 • Gender

1317 A Cox proportional hazards model will be fit with each predictor simultaneously.  
 1318 Each subject's response will be the time until the subject experiences AF as



1319 defined in section 12.2.2. If a subject does not experience AF during follow-up,  
1320 the subject will be censored at their last device interrogation. Time 0 will be the  
1321 date of implant. Age, BMI, BNP, C-reactive protein, Troponin-I, and TSH will be  
1322 considered continuous variables in the model, while the other covariates will be  
1323 treated as binary variables.

#### 1324 *12.2.6 Determination of Subjects/Data for Analysis*

1325 Subjects who were successfully implanted with Reveal ICM will be included in the  
1326 analysis cohort. For those subjects who do not complete follow-up or receive a  
1327 Medtronic IPG, ICD, or CRT during the course of the study, the analysis will include all  
1328 data up to the point of their last useable interrogation. However, subjects will be  
1329 excluded from analysis based on the following CIP violations that would affect endpoint  
1330 analysis:

- 1331 • Subject had AF prior to the Reveal ICM implant
- 1332 • Subject was taking an anti-arrhythmic medication at time of enrollment

1333

### 1334 **12.3 Secondary Objective #2: Clinical Actions for AF**

1335 Characterize the timing and nature of clinical actions relative to detection of AF in  
1336 patients who are at high risk of having AF.

#### 1337 *12.3.1 Hypothesis*

1338 There are no pre-specified hypotheses for this objective, as the goal of the  
1339 objective is to characterize clinical actions in response to AF detection.

#### 1340 *12.3.2 Endpoint Definition*

1341 Actions taken in response to awareness and management of AF as identified by  
1342 the clinician will be considered endpoints. AF might be an individual episode, or  
1343 cumulative AF burden from the device's daily AF trending diagnostic, or it could be  
1344 identified by some other means.

#### 1345 *12.3.3 Performance Requirements*

1346 There are no performance requirements for this objective, as the purpose is simply  
1347 to characterize the timing of clinical actions in response to awareness of AF.

#### 1348 *12.3.4 Sample Size Determination*

1349 There is no sample size requirement for this objective.

#### 1350 *12.3.5 Analysis Methods*

1351 Descriptive statistics will be used to summarize the actions taken when AF is  
1352 identified by the clinician. This will include a breakdown of what types of actions  
1353 are taken in response to awareness of AF. A Kaplan-Meier curve will be  
1354 generated with Time 0 as the time of first AF diagnosis, and the event time as the  
1355 time from Time 0 to the first action taken for AF. Annualized rates of specific  
1356 actions (e.g. cardioversions, initiation of OAC, etc.) will be generated in 6 month  
1357 intervals.

1358 **12.3.6 Determination of Patients/Data for Analysis**

1359 Subjects who were successfully implanted will be included in the analysis cohort for  
1360 that. However, subjects will be excluded from analysis based on the following CIP  
1361 violations:

- 1362 • Subject had AF prior to the Reveal ICM implant
- 1363 • Subject did not satisfy the CHADS<sub>2</sub> score inclusion criterion at time of study  
1364 enrollment
- 1365 • Subject was taking an anti-arrhythmic medication at time of enrollment  
1366

1367 **12.4 Exploratory Objective #1: AF Burden**

1368 Characterize AF burden over time in patients who are at high risk of having AF.

1369 **12.4.1 Hypothesis**

1370 There are no pre-specified hypotheses for this objective. The purpose of the  
1371 objective is to estimate incidence of different amounts of daily AF in this patient  
1372 population.

1373 **12.4.2 Endpoint Definition**

1374 For analyses showing the incidence of pre-defined amounts of device-detected AF  
1375 in a single day, the following endpoints will be used:

- 1376 • A day with at least 6 minutes of device-detected AF
- 1377 • A day with at least 30 minutes of device-detected AF
- 1378 • A day with at least 1 hour of device-detected AF
- 1379 • A day with at least 6 hours of device-detected AF

1380 These endpoints will be defined by device classification of arrhythmias rather than  
1381 adjudication of arrhythmias.

1382 **12.4.3 Performance Requirements**

1383 There are no performance requirements for this objective, as the purpose is simply  
1384 to estimate the incidence of different daily amounts of AF in this patient population.

1385 **12.4.4 Sample Size Determination**

1386 There is no sample size requirement for this objective.

1387 **12.4.5 Analysis Methods**

1388 To assess the development of pre-specified amounts of AF over time, Kaplan-  
1389 Meier event curves will be generated for each of the endpoints described in  
1390 section 12.4.2. Time 0 will be defined as the day of implant. For each curve, if a  
1391 subject does not experience the corresponding endpoint during follow-up, the  
1392 subject will be censored at the last device interrogation. AF burden beyond the  
1393 first such event will be summarized by determining, for each day, the percentage  
1394 of subjects experiencing each of the endpoints, and plotting the percentage for  
1395 each such endpoint over time.

1396 **12.4.6 Determination of Patients/Data for Analysis**

1397 Subjects who were successfully implanted with Reveal ICM will be included in the  
1398 analysis cohort. For those subjects who do not complete follow-up or receive a  
1399 Medtronic IPG, ICD, or CRT during the course of the study, the analysis will include all  
1400 data up to the point of their last useable interrogation. However, subjects will be  
1401 excluded from analysis based on the following CIP violations:

- 1402 • Subject had AF prior to the Reveal ICM implant
- 1403 • Subject was taking an anti-arrhythmic medication at time of enrollment

1404

1405 **12.5 Exploratory Objective #2: Non-atrial Arrhythmias**

1406 Characterize the presence of non-atrial arrhythmias in patients who are at high risk of  
1407 having AF.

1408 **12.5.1 Hypothesis**

1409 There are no pre-specified hypotheses for this objective. The purpose of the  
1410 objective is to estimate non-atrial arrhythmic activity in this patient population.

1411 **12.5.2 Endpoint Definition**

1412 Endpoints for this objective will be the following:

- 1413 • Asystole (as defined by the device),
- 1414 • Ventricular arrhythmias (as defined by the device),
- 1415 • Bradycardia (as defined by the device).

1416 These episodes will not be adjudicated, and so the device classifications will be  
1417 used. Additionally, episodes classified by the device as AF but adjudicated to be  
1418 asystole, ventricular arrhythmias, or bradycardia will also be counted as endpoints.

1419 **12.5.3 Performance Requirements**

1420 There are no performance requirements for this objective, as the purpose is simply  
1421 to characterize rates of non-atrial arrhythmias as recorded by the device.

1422 **12.5.4 Sample Size Determination**

1423 There is no sample size requirement for this objective.

1424 **12.5.5 Analysis Methods**

1425 Stored device data will be collected via CareLink transmissions or in-office device  
1426 interrogations. All non-atrial arrhythmias occurring within the follow-up period and  
1427 reported by the device will be included in the analysis. Kaplan-Meier event curves  
1428 will be generated to show the rate of first device detection of arrhythmias for each  
1429 type. Descriptive statistics will also be provided for rates of each type of non-atrial  
1430 arrhythmia.

1431 **12.5.6 Determination of Patients/Data for Analysis**

1432 Subjects who were successfully implanted with Reveal ICM will be included in the  
1433 analysis cohort. For those subjects who do not complete follow-up or receive a

1434 Medtronic IPG, ICD, or CRT during the course of the study, the analysis will include  
1435 all data up to the point of their last useable interrogation.

1436 However, subjects will be excluded from analysis based on the following CIP  
1437 violations:

- 1438 • Subject had AF prior to the Reveal ICM implant
- 1439 • Subject did not satisfy the CHADS<sub>2</sub> score inclusion criterion at time of  
1440 study enrollment
- 1441 • Subject was taking an anti-arrhythmic medication at time of  
1442 enrollment

1443

## 1444 **12.6 Exploratory Objective #3: Quality of Life**

1445 Characterize Quality of Life over time in patients who are at high risk of having AF.

### 1446 *12.6.1 Hypothesis*

1447 There is no pre-specified hypothesis for this objective. The purpose of the  
1448 objective is to estimate average Quality of Life over time, as measured by the EQ-  
1449 5D Quality of Life questionnaire.

### 1450 *12.6.2 Endpoint Definition*

1451 The endpoints will be defined as the EQ-5D index score at each of the following  
1452 time points: baseline, 6 months, 12 months, and 18 months.

### 1453 *12.6.3 Performance Requirements*

1454 There are no performance requirements for this objective, as the purpose is to  
1455 characterize quality of life, as measured by the EQ-5D index score, over time in  
1456 this population.

### 1457 *12.6.4 Sample Size Determination*

1458 There is no sample size requirement for this objective.

### 1459 *12.6.5 Analysis Methods*

1460 Subjects will be asked to complete the EQ-5D questionnaire at baseline, 6, 12, 18,  
1461 24, and 30 months. Descriptive statistics will be used to summarize the results at  
1462 each time point.

### 1463 *12.6.6 Determination of Patients/Data for Analysis*

1464 Subjects who were successfully implanted with Reveal ICM will be included in the  
1465 analysis cohort. Missing QOL data will not be imputed for analysis. However,  
1466 subjects will be excluded from analysis based on the following CIP violations:

- 1467 • Subject had AF prior to the Reveal ICM implant
- 1468 • Subject did not satisfy the CHADS<sub>2</sub> score inclusion criterion at time of study  
1469 enrollment
- 1470 • Subject was taking an anti-arrhythmic medication at time of enrollment

1471

1472 **12.7 Exploratory Objective #4: Healthcare Utilization**

1473 Characterize healthcare utilization in patients who are at high risk of having AF.

1474 *12.7.1 Hypothesis*

1475 There are no pre-specified hypotheses for this objective. The purpose of the  
1476 objective is to characterize the rate of healthcare utilizations in this patient  
1477 population.

1478 *12.7.2 Endpoint Definition*

1479 The following will be considered endpoints:

- 1480 • Cardiovascular related Inpatient Hospitalizations
- 1481 • Cardiovascular related Outpatient/Procedure Visits
- 1482 • Cardiovascular related ED visits
- 1483 • Cardiovascular related Urgent Care Visits
- 1484 • Cardiovascular related Unscheduled Clinic Visits
- 1485 • Device-related visits
- 1486 • Renal-related visits
- 1487 • Syncope-related visits
- 1488 • Dyspnea-related visits

1489 *12.7.3 Performance Requirements*

1490 There are no performance requirements for this objective, as the purpose is simply  
1491 to characterize rates of CV healthcare utilization in this patient population.

1492 *12.7.4 Sample Size Determination*

1493 There is no sample size requirement for this objective.

1494 *12.7.5 Analysis Methods*

1495 Annualized rates of each of the endpoints in section 12.7.2 will be generated, both  
1496 overall and in 6 month intervals (e.g. CV inpatient hospitalization rate in first 6  
1497 months, months 6-12, etc.) to evaluate whether the rates change over time.

1498 *12.7.6 Determination of Patients/Data for Analysis*

1499 Subjects who were successfully implanted with Reveal ICM will be included in the  
1500 analysis cohort. However, subjects will be excluded from analysis based on the  
1501 following CIP violations:

- 1502 • Subject had AF prior to the Reveal ICM implant
- 1503 • Subject did not satisfy the CHADS<sub>2</sub> score inclusion criterion at time of study  
1504 enrollment
- 1505 • Subject was taking an anti-arrhythmic medication at time of enrollment

1506

1507 **12.8 Exploratory Objective #5: Progression to Persistent AF**

1508 Identify predictors of progression to persistent AF in patients who are at high risk of  
1509 having AF.

1510 *12.8.1 Hypothesis*

1511 Let  $h_0(t)$  denote the hazard rate for patients at high risk of AF developing  
1512 persistent AF. Consider a set of baseline characteristics  $X_1, X_2, \dots$ . It is assumed  
1513 that if these particular characteristics affect a patient's risk of developing persistent  
1514 AF, the effects have the form

1515 
$$h(t) = h_0(t)\exp(\beta_1X_1 + \beta_2X_2 + \dots)$$

1516 The null hypothesis is that these covariates have no effect on a patient's risk of  
1517 developing persistent AF. In other words,

1518  $H_0: \beta_i = 0$  for all  $i$

1519  $H_A: \beta_i \neq 0$  for some  $i$

1520 *12.8.2 Endpoint Definition*

1521 Persistent AF will be defined as 7 consecutive days with 23+ hours of device-  
1522 detected AF, or less than 7 consecutive days with 23+ hours of device-detected  
1523 AF due to a cardioversion.

1524 *12.8.3 Performance Requirements*

1525 The null hypothesis will be rejected if the p-value for any of the covariates listed in  
1526 section 12.8.5 is less than 0.05.

1527 *12.8.4 Sample Size Determination*

1528 There is no sample size requirement for this objective.

1529 *12.8.5 Analysis Methods*

1530 The following baseline measurements will be evaluated in testing for predictors of  
1531 persistent AF:

- 1532 • Diabetes
- 1533 • NYHA
- 1534 • Age
- 1535 • Hypertension
- 1536 • Renal impairment
- 1537 • COPD
- 1538 • BMI
- 1539 • BNP
- 1540 • C-reactive protein
- 1541 • Troponin-I
- 1542 • TSH
- 1543 • Prior stroke occurring >1 year ago
- 1544 • Coronary artery disease

- 1545 • Sleep apnea
- 1546 • Family History
- 1547 • Vascular disease
- 1548 • Gender

1549 A Cox proportional hazards model will be fit with each predictor simultaneously.  
1550 Each subject's response will be the time until the subject experiences persistent  
1551 AF as defined in section 12.8.2. If a subject does not experience persistent AF  
1552 during follow-up, the subject will be censored at their last device interrogation.  
1553 Time 0 will be the date of implant. Age, BMI, BNP, C-reactive protein, Troponin-I,  
1554 and TSH will be considered continuous variables in the model, while the other  
1555 covariates will be treated as binary variables. A Kaplan-Meier curve will be  
1556 generated estimating freedom from persistent AF in this population.

1557

1558 For those subjects who experience a first AF episode as defined in section 12.1.2,  
1559 a similar analysis will be done with Time 0 as the date of that first AF episode.

#### 1560 12.8.6 Determination of Patients/Data for Analysis

1561 All subjects who were successfully implanted with Reveal ICM will be included in the  
1562 analysis cohort. For the analysis evaluating time to progression from first AF onset to  
1563 persistent AF, only subjects with an AF episode satisfying the primary endpoint  
1564 definition will be included. For those subjects who do not complete follow-up or receive  
1565 a Medtronic IPG, ICD, or CRT during the course of the study, the analysis will include  
1566 all data up to the point of their last useable interrogation. However, subjects will be  
1567 excluded from analysis based on the following CIP violations:

- 1568 • Subject had AF prior to the Reveal ICM implant
- 1569 • Subject was on an anti-arrhythmic medication at time of enrollment

#### 1570 12.9 General considerations

1571 Data from all study centers will be pooled for analysis. Standard statistical methods  
1572 will be employed to summarize and analyze the data.

1573 The Statistical Analysis Plan (SAP) will include a comprehensive description of the  
1574 statistical methods and reports to be included in the final study report. Any change to  
1575 the data analytic methods described in the CIP will require an amendment ONLY if it  
1576 changes a principal feature of the CIP. Any other change to the data analysis  
1577 methods described in the CIP, and the justification for making the change, will be  
1578 described in the clinical study report.

1579 Confidence intervals and any statistical significance testing will employ an alpha level  
1580 of 0.05 unless otherwise stated. Tests of hypotheses will be two-tailed.

#### 1581 12.10 Missing data

1582 If a subject is exited prior to study closure, his/her data will be included in analyses  
1583 through the last date for which the center in contact with the subject for the  
1584 healthcare utilization and Quality of Life objectives. For objectives with endpoints  
1585 defined by device data (e.g. predictors of AF, incidence of AF, progression of  
1586 persistent AF), only data through a subject's last device interrogation will be used.

1587 For the AF predictor objectives, if one or more baseline covariates is missing for a  
1588 subject, multiple imputation may be performed to assess robustness of results to  
1589 missing data.

#### 1590 **12.11 Adjustments for Covariates**

1591 No adjustments for covariates are planned, except in the case of evaluating  
1592 predictors of AF.

#### 1593 **12.12 Subgroup analysis**

1594 Multiple regression techniques will be used to determine whether there are  
1595 characteristics or combination of characteristics present at baseline that have  
1596 significant ability to predict which subjects will ultimately be found to have AF.

### 1597 **13. DATA AND QUALITY MANAGEMENT**

1598 Data will be collected using an electronic data management system for clinical trials.  
1599 Electronic CRF data will be stored in a secure, password-protected database which will be  
1600 backed up nightly. Data will be reviewed using programmed and manual data checks.  
1601 Data queries will be made available to centers for resolution. Study management reports  
1602 may be generated to monitor data quality and study progress. At the end of the study, the  
1603 data will be frozen and will be retained indefinitely by Medtronic.

1604 The data reported on the eCRFs shall be derived from source documents and be  
1605 consistent with these source documents, and any discrepancies shall be explained in  
1606 writing.

1607 For source documentation, the center study team must sign and date any copies or  
1608 printouts of original source document with a statement that this is a true reproduction of  
1609 the original source document and any discrepancies shall be explained in writing. Site  
1610 study team must mark patient files for participation in the study.

1611 Device interrogation data collected at follow up visits shall be sent to Medtronic and a copy  
1612 must be kept on site. Device data from transmissions will be uploaded to secure servers.  
1613 Upon receipt, device data will be maintained with secure databases and retrieved for  
1614 analysis and reporting.

1615 The sponsor may audit and a regulatory authority may inspect the study center to evaluate  
1616 the conduct of the study. If a regulatory authority announces that an inspection of the study  
1617 center will occur, this announcement must be provided to Medtronic immediately. The  
1618 clinical investigator(s)/institution(s) shall allow study-related monitoring, audits, EC/IRB  
1619 review, and regulatory inspection(s) by providing direct access to source data/documents.  
1620 Confidentiality of data shall be observed by all parties at all times throughout the clinical  
1621 study. All data shall be secured against unauthorized access.

### 1622 **14. WARRANTY/INSURANCE INFORMATION**

#### 1623 **14.1 Warranty**

1624 Warranty information is provided in the product packaging for the commercially released  
1625 Reveal ICM system. Additional copies are available upon request.



1626 **14.2 Insurance (Europe)**

1627 Medtronic Bakken Research Center B.V. is a wholly owned subsidiary of Medtronic, Inc.,  
1628 which as the parent company of such entity maintains appropriate clinical trial liability  
1629 insurance coverage as required under applicable laws and regulations and will comply with  
1630 applicable local law and custom concerning specific insurance coverage. If required, a  
1631 Clinical Trial insurance statement/certificate will be provided to the EC/IRB.

1632 **15. MONITORING**

1633 It is the responsibility of Medtronic to ensure proper monitoring of this clinical investigation.  
1634 Trained Medtronic personnel, or delegates appointed by Medtronic, will perform monitoring  
1635 at the study center to ensure that the study is conducted in accordance with the CIP, the  
1636 CTA, and applicable regulatory supervisory requirements including those of the EC/IRB.  
1637 Monitoring is also performed to ensure that Regulatory documentation is up-to-date, to  
1638 ensure that other records and reports are properly maintained, and to review source  
1639 documents against eCRF entries. Medtronic, or its delegates, must therefore be allowed  
1640 access to the subjects' case histories (clinic and hospital records, and other source  
1641 data/documentation) when so requested as per the ICF, Research Authorization (where  
1642 applicable) and CTA.

1643 **15.1 Monitoring Visits**

1644 Frequency of monitoring visits may be based on subject enrollment, duration of the study,  
1645 study compliance, findings from previous monitoring visits and any suspected inconsistency  
1646 in data that requires investigation. Regulatory documents (e.g., EC/IRB approval letters and  
1647 CTAs) will be reviewed at each study center. Subject data will be monitored against source  
1648 documentation (e.g., clinic and hospital charts). Monitoring for the study will be done in  
1649 accordance to the study monitoring plan.

1650  
1651 Monitoring visits will be conducted periodically to assess center study progress, the  
1652 investigator's adherence to the CIP, regulatory compliance including but not limited to  
1653 EC/IRB approval and review of the study, maintenance of records and reports, and review  
1654 of source documents against subject eCRFs. Monitors verify center regulatory and study  
1655 compliance by identifying findings of non-compliance and communicating those findings  
1656 along with recommendations for preventative/corrective actions to center personnel.  
1657 Communication with the center personnel occurs during the visit and following the visit via  
1658 a written follow up letter. Monitors may work with study personnel to determine appropriate  
1659 corrective action recommendations and to identify trends within the study or at a particular  
1660 center. Study closure visits may be conducted via telephone, letter or an on-site visit at  
1661 each enrolling study center according to the monitoring plan.

1662

1663 **16. REQUIRED RECORDS AND REPORTS**

1664 **16.1 Investigator records**

1665 The investigator has overarching responsibility for the preparation and retention of the  
1666 records cited below. All of the below records, with the exception of case history records,  
1667 case report forms, and other documents directly related to subjects, should be kept in the  
1668 Study Center File (i.e., the study binder provided to the investigator). Electronic Case

1669 Report Forms (eCRFs) may be maintained and signed electronically within the electronic  
1670 data capture system during the trial.

1671 The following records are subject to inspection and must be retained for a period of two  
1672 years (or longer as local law or hospital administration requires) after the study is  
1673 terminated:

- 1674 • All key correspondence between the MEC/IRB, sponsor, monitor, Competent  
1675 Authority and/or the investigator that pertains to the study, including required  
1676 reports.
- 1677 • Subject's case history records, including:
  - 1678 ○ Signed and dated ICF. In U.S. signed and dated by subject. Signed and  
1679 dated by subject and investigator as required by geography.
  - 1680 ○ Observations of Adverse Events
  - 1681 ○ Medical history
  - 1682 ○ Implant (when applicable) and follow-up data
  - 1683 ○ Source for all eCRF elements
  - 1684 ○ Documentation of the dates and rationale for any deviation from the CIP
- 1685 • All approved versions of the CIP.
- 1686 • Executed CTA.
- 1687 • Investigator(s) Curriculum Vitae (CV) (Unites States)
- 1688 • Current, signed and dated Curriculum Vitae (CV) of the Principal Investigator and all  
1689 key members in the study (Europe)
- 1690 • Documentation of delegated tasks.
- 1691 • MEC/IRB approval documentation. Written information that the investigator or other  
1692 study staff, when member of the MEC/IRB, did not participate in the approval  
1693 process.
- 1694 • Study training records for center staff (this includes anyone listed on the delegated  
1695 task list).
- 1696 • Insurance certificates (as required by geography).
- 1697 • Any other records that IRB/EC or local regulatory agencies require to be  
1698 maintained.
- 1699 • Final Study Report including the statistical analysis.
- 1700 • Subject screening log
- 1701 • Monitoring Log
- 1702 • Site specific ICF

## 1703 **16.2 Investigator reports**

1704 The investigator is responsible for the preparation (review and signature) and submission to  
1705 the sponsor of all eCRFs, adverse events, deaths, and any deviations from theCIP. If any  
1706 action is taken by an IRB/MEC with respect to this clinical study, copies of all pertinent  
1707 documentation must be forwarded to Medtronic in a timely manner. Reports are subject to  
1708 inspection and to the retention requirements as described above for investigator records.

1709 Investigator reporting requirements for items related to Safety data are listed in Section 9.5.  
1710 Table 11 and Table 12 below cover the investigator reporting requirements for all other  
1711 reports. The investigator shall prepare and submit in a complete, accurate and timely  
1712 manner the reports listed in this section.

1713

1714

**Table 11: Investigator reports applicable to the United States**

| Report                             | Submit to             | Description/Constraints                                                                                                                                                                    |
|------------------------------------|-----------------------|--------------------------------------------------------------------------------------------------------------------------------------------------------------------------------------------|
| Withdrawal of IRB/MEC approval     | Sponsor               | The investigator must report a withdrawal of approval by the reviewing IRB/MEC of the investigator's part of the investigation within 5 working days.                                      |
| Study Deviations                   | Sponsor and IRB/MEC   | Reporting of study deviations should comply with MEC/IRB policies and/or local laws and must be reported to Medtronic as soon as possible upon the center becoming aware of the deviation. |
| Final Report                       | IRBs/MECs             | This report must be submitted within 6 months of study completion or termination.                                                                                                          |
| Failure to obtain informed consent | Sponsor and IRBs/MECs | Informed consent shall be obtained in writing from the subject and the process shall be documented before any procedure specific to the clinical investigation is applied to the subject   |

1715

1716

1717

**Table 12: Investigator reports applicable to Europe**

| Report                             | Submit to             | Description/Constraints                                                                                                                                                                                                                                                                                                                                                                                                                                                         |
|------------------------------------|-----------------------|---------------------------------------------------------------------------------------------------------------------------------------------------------------------------------------------------------------------------------------------------------------------------------------------------------------------------------------------------------------------------------------------------------------------------------------------------------------------------------|
| Withdrawal of IRB/MEC approval     | Sponsor               | The principal investigator or authorized designee shall promptly inform the sponsor and enrolled subjects at his/her study site, as appropriate.                                                                                                                                                                                                                                                                                                                                |
| Progress Report                    | Sponsor and IRB/MEC   | Provide if required by local law or MEC/IRB.                                                                                                                                                                                                                                                                                                                                                                                                                                    |
| Study Deviations                   | Sponsor and IRB/MEC   | The principal investigator shall document and explain any deviation from the approved CIP that occurred during the course of the clinical investigation<br><br>The principal investigator shall promptly report any deviations from the CIP that affect the rights, safety or wellbeing of the subject or the scientific integrity of the clinical investigation, including those which occur under emergency circumstances, if required by the EC, CIP or national regulation, |
| Failure to obtain informed consent | Sponsor and IRBs/MECs | Informed consent shall be obtained in writing from the subject and the process shall be documented before any procedure specific to the clinical investigation is applied to the subject                                                                                                                                                                                                                                                                                        |
| Significant new information        | Subject               | If new information becomes available that can significantly affect a subject's future health and medical care, this information shall be provided to the subject(s) affected in written form. If relevant, all affected subjects shall be asked to confirm their continuing informed consent in writing                                                                                                                                                                         |

1718

**16.3 Sponsor records**

1719

Medtronic shall maintain the following accurate, complete, and current records:

1720

- All key correspondence which pertains to the investigation

- 1721 • Signed CTAs, current signed and dated curriculum vitae (CVs) of principal
- 1722 investigator and as required by geography CVs of key members of the investigation
- 1723 center team, documentation of delegated task.
- 1724 • All signed and dated case report forms submitted by investigator, samples of ICF,
- 1725 and other information provided to the subjects
- 1726 • Copies of all EC/IRB approval letters and relevant EC/IRB correspondence
- 1727 • Correspondence with regulatory authorities as required by local geographies
- 1728 • Names of the institutions in which the clinical investigation will be conducted
- 1729 • Notification, correspondence and approval of authorities as required by national
- 1730 legislation
- 1731 • Insurance certificates (as required by geography)
- 1732 • Forms for reporting any AEs
- 1733 • Names/contact addresses of monitors
- 1734 • Statistical analyses and underlying supporting data
- 1735 • Final report of the clinical investigation
- 1736 • The CIP and study related reports
- 1737 • Study training records for center personnel, Medtronic personnel and others
- 1738 involved in the study
- 1739 • Any other records that local regulatory agencies require to be maintained.
- 1740 • Investigator selection reports
- 1741 • Monitoring visit reports, follow-up letters and any additional correspondence
- 1742 • Blank set of CRFs

1743 **16.4 Sponsor reports**

1744 Medtronic shall prepare and submit the following complete, accurate, and timely reports  
 1745 listed in the tables below (by geography). In addition to the reports listed below, Medtronic  
 1746 shall, upon request of reviewing IRB/MEC, regulatory agency provide accurate, complete  
 1747 and current information about any aspect of the investigation. Safety data Medtronic  
 1748 reporting requirements are listed in Section 9.5 of the Adverse Event section.

1749 **Table 13: Sponsor reports for the United States**

| Report                                                            | Submit to                                                                   | Description/Constraints                                                                                                               |
|-------------------------------------------------------------------|-----------------------------------------------------------------------------|---------------------------------------------------------------------------------------------------------------------------------------|
| Premature termination or suspension of the clinical investigation | Investigators<br>IRB/MEC<br>Relevant authorities<br>Head of the Institution | Provide prompt notification of termination or suspension and reason(s).                                                               |
| Final report                                                      | Investigators,<br>IRB/MEC,                                                  | A final report will be submitted to the investigators, and IRBs/MECs within six months after completion or termination of this study. |
| Study deviation                                                   | Investigators                                                               | Site specific study deviations will be submitted to investigators periodically.                                                       |

1750

1751 **Table 14: Sponsor reports for Europe**

| Report | Submit to | Description/Constraints |
|--------|-----------|-------------------------|
|--------|-----------|-------------------------|

| Report                                                            | Submit to                                                                   | Description/Constraints                                                                                                                                                                                                                                                                                                                                                                                            |
|-------------------------------------------------------------------|-----------------------------------------------------------------------------|--------------------------------------------------------------------------------------------------------------------------------------------------------------------------------------------------------------------------------------------------------------------------------------------------------------------------------------------------------------------------------------------------------------------|
| Premature termination or suspension of the clinical investigation | Investigators<br>IRB/MEC<br>Relevant authorities<br>Head of the Institution | Provide prompt notification of termination or suspension and reason(s))                                                                                                                                                                                                                                                                                                                                            |
| Withdrawal of IRB/MEC approval                                    | Investigators<br>Head of Institution<br>IRB/MEC<br>relevant authorities     | Investigators, IRBs/MECs will be notified only if required by local laws or by the IRB/MEC.                                                                                                                                                                                                                                                                                                                        |
| Withdrawal of CA approval                                         | Investigators<br>Head of Institution<br>IRB/MEC<br>relevant authorities     | Investigators, IRBs/MECs will be notified only if required by local laws or by the IRB/MEC.                                                                                                                                                                                                                                                                                                                        |
| SAE Report                                                        | Regulatory authorities                                                      | Weekly cardiovascular SAE report, as required by local geography.                                                                                                                                                                                                                                                                                                                                                  |
| Progress Reports                                                  | IRB/MEC and relevant authorities                                            | This report will be submitted only if required by the local geographies IRB//MEC).                                                                                                                                                                                                                                                                                                                                 |
| Final report                                                      | Investigators,<br>IRB/MEC,<br>Regulatory authorities upon request           | The investigator shall have the opportunity to review and comment on the final report. If a clinical investigator does not agree with the final report, his/her comments shall be communicated to the other investigator(s). The coordinating investigator shall sign the report. If no coordinating investigator is appointed, then the signature of the principal investigator in each center should be obtained |
| Study deviation                                                   | Investigators                                                               | Ensure that all deviations from the CIP are reviewed with the appropriate clinical investigator(s), are reported on the case report forms and the final report of the clinical investigation Site specific study deviations will be submitted to investigators periodically.                                                                                                                                       |

1752

1753 Medtronic records and reports will be stored in locked file cabinets at Medtronic during the  
1754 course of the study. Electronic versions of the reports will be kept on a password-protected  
1755 document management system. After closure of the study, all records and reports will be  
1756 archived indefinitely.

1757

1758  
1759  
1760

## **APPENDIX A: DRAFT CASE REPORT FORMS**

Case report forms for the Reveal AF study will be provided under separate cover.

1761 **APPENDIX B: PRELIMINARY PUBLICATION PLAN**

1762 Publications from the REVEAL AF clinical study will be handled according to appropriate  
1763 Medtronic Standard Operating Procedures and as indicated in the CTA. The final  
1764 publication plan will be maintained under separate cover.

1765

1766

1767

1768 **APPENDIX C: COMMITTEES**

1769  
1770 **Steering Committee**

1771 The Steering Committee will guide decisions about study design and data collection in  
1772 order to achieve a design that is robust but can be achieved given current physician  
1773 practice, i.e. what is the standard approach to management of AF patients. They will also  
1774 be responsible for:

- 1775 • Guidance on overall study issues
- 1776 • Assistance, as needed, with general study execution issues
- 1777 • Providing representation for the study at major professional meetings
- 1778 • Representing the study investigators
- 1779 • Compositional leadership, as needed, for publications

1780  
1781 **Endpoint Adjudication Committee:**

1782 The endpoint adjudication committee will review Reveal ICM detected AF to determine if  
1783 true AF was present. The committee will be comprised of: 1) the study center investigators,  
1784 2) Medtronic representative that are experienced with reviewing Reveal ICM detected AF  
1785 (this could include but is not limited to FCEs), 3) a committee chairperson who is a  
1786 physician (independent of study center and Medtronic) that is experienced at reviewing  
1787 Reveal ICM detected AF. Medtronic will appoint the committee chairperson and the  
1788 Medtronic representatives.

1789 Initially, the endpoint adjudication will consist of the study center investigator and a  
1790 Medtronic representative independently reviewing the Reveal ICM detected AF episodes.  
1791 The study center investigator will document on an episode log eCRF for each device  
1792 detected AF episode for which EGM was available and document if they agree or not if the  
1793 device detected episode of AF is accurate. Independently, all device detected episodes  
1794 with EGM will also be reviewed by a Medtronic representative. If the assessments by the  
1795 study center investigator and the Medtronic personnel are in agreement, this outcome will  
1796 be accepted as the final determination that AF did or did not occur. This outcome will be  
1797 accepted for the data analysis.

1798 For episodes in which the study center investigator's classification and the Medtronic  
1799 representative's classification do not agree regarding whether the episode is AF, the  
1800 episode will be reviewed by the committee chairperson. The outcome of the committee  
1801 chairperson's review will be accepted as the final determination that AF did or did not  
1802 occur. This outcome will be accepted for the data analysis.

1803  
1804 **Publication Committee:**

1805 The publication committee will be responsible for publication planning, authorship criteria,  
1806 and the dissemination of study results.

1807



**APPENDIX D: STUDY OVERVIEW / SYNOPSIS**

**Title:** Reveal AF

**Purpose:** The purpose of the REVEAL AF study is to determine, via continuous monitoring with the Reveal ICM device, the incidence of AF in patients suspected to be at high risk for having AF and to understand how physicians managed these patients once AF has been detected. Furthermore, the study will seek to identify what patient characteristics are most predictive of developing AF. This information may facilitate the ability to identify those patients that are at highest risk for developing AF, and for whom the Reveal ICM may be most beneficial and potentially cost saving.

**Study Design:** The REVEAL AF study is a prospective, single arm, open-label, multi-center, post-market interventional study to evaluate the incidence of AF in patients that are suspected to be at high risk of having AF, as defined by a modified CHADS<sub>2</sub> score as defined in the inclusion criteria. Prior to initiating any study specific procedures, patients must sign and date an ICF to be enrolled in the study. Up to 450 subjects are planned to be enrolled into the study, to have approximately 400 patients implanted with the Reveal ICM. Inclusion/Exclusion criteria will be evaluated and the patients' medical history and baseline information will be collected and then the Reveal ICM device will be implanted. Enrolled subjects who have a successful Reveal ICM implant will then be followed for a minimum of 18 months to monitor for the detection of AF, and up to a maximum of 30 months or until the last subject has completed their 18 month follow-up visit. During the follow-up period, subjects will have in-office visits every 6 months and will transmit device data via CareLink® on a monthly basis. The total duration of enrollment is anticipated to last approximately 24 months and the study duration is anticipated to last approximately 42 months.

**Primary Objectives:** Determine the incidence rate of atrial fibrillation lasting greater than or equal to six minutes in patients who are at high risk of having atrial fibrillation

**Secondary Objectives:**

- Identify predictors of AF onset in patients who are at high risk of having atrial fibrillation.
- Characterize the timing and nature of clinical actions relative to detection of AF in patients who are at high risk of having atrial fibrillation.

**Inclusion Criteria:**

Individuals enrolled in the study must meet all of the following criteria:

- Patient meets the approved indications to receive the Reveal ICM.
- Patient is suspected, based on symptomatology and/or demographics, of having atrial fibrillation or at high risk of having AF, as determined by the clinical investigator
- Patient has a CHADS<sub>2</sub> score  $\geq$  3 OR has a CHADS<sub>2</sub> score = 2 and at least one of the following documented:
  - Coronary artery disease
  - Renal impairment (GFR 30-60 ml/min)
  - Sleep apnea
  - Chronic obstructive pulmonary disease

Note: stroke/TIA criterion as part of the CHADS<sub>2</sub> score for this trial is limited to either an ischemic stroke or TIA, which occurred more than one year prior to enrollment.

- Patient is 18 years of age or older
- Patient has a life expectancy of 18 months or more
- Patient, or legally authorized representative, is willing to sign and date the consent form
- Patient is willing and able to be remotely monitored (i.e., eligible for enrollment into the

**Exclusion Criteria:**

Individuals who meet any of the following criteria are not eligible to be enrolled in the study:

- Patient has a documented history of AF or atrial flutter.
- Patient had an ischemic stroke or TIA within past year prior to enrollment
- Patient has a history of a hemorrhagic stroke
- Patient is currently implanted with an IPG, ICD, CRT-P, or CRT-D device
- NYHA Class IV Heart Failure patient
- Patient had heart surgery within previous 90 days prior to enrollment
- Patient had an MI within the previous 90 days prior to enrollment
- Patient is taking chronic immuno-suppressant therapy
- Patient is taking an anti-arrhythmic drug
- Patient is contraindicated for long term anticoagulation medication
- Patient is taking a long-term anticoagulation medication
- Any concomitant condition which, in the opinion of the investigator, would not allow safe participation in the study (e.g., drug addiction, alcohol abuse, emotional / psychological diagnosis).
- Patient is enrolled in another study that could confound the results of this study, without documented pre-approval from Medtronic study manager
- Patient has a creatinine clearance <30 ml/min or is on dialysis (completed within past 6 months prior to enrollment) or is on dialysis
  - Note: if the clinical investigator suspects the renal dysfunction to be reversible a single repeat creatinine clearance assessment can be made.

**Device Description:** The study will use the Medtronic Reveal ICM device which comprises of the Reveal insertable cardiac monitor (model 9529 with FullView™ Software or later Medtronic releases), the Medtronic CareLink Programmer (model 2090 with FullView™ Software or later Medtronic releases), the Reveal Patient Assistant (model 9538 or successor model), and the Medtronic CareLink Monitor (model 2490G or successor model). All components are market-released and will be used in accordance with labeling indications.

1809

1810  
1811  
1812  
1813  
1814  
1815  
1816  
1817  
1818  
1819  
1820  
1821  
1822  
1823  
1824  
1825  
1826  
1827  
1828  
1829  
1830  
1831  
1832  
1833  
1834  
1835  
1836  
1837  
1838  
1839  
1840  
1841  
1842  
1843  
1844  
1845  
1846  
1847  
1848  
1849  
1850  
1851  
1852

## **APPENDIX E: INFORMED CONSENT TEMPLATES**

Geography specific Informed Consent form templates will be provided under separate cover.

1853 **APPENDIX F: PARTICIPATING INVESTIGATORS AND**  
1854 **INSTITUTIONS**

1855 A complete list of participating investigators and institutions where study activities will be  
1856 conducted will be distributed under a separate cover.

1857

1858

1859

1860 **APPENDIX G: EC/IRBLIST**

1861 At the time of completion of the REVEAL AF Clinical Investigation Plan (Version 2) center  
1862 confirmation was not finalized. Therefore, a complete list of participating EC/IRBs and the  
1863 Chairperson(s) will be distributed under a separate cover when available.

1864

1865

1866 **APPENDIX H: LABELING**

1867 Labeling for all the components of the market approved Reveal ICM system can be found  
1868 with each package insert. Refer to the Clinician Manual for product details for the Reveal  
1869 ICM.

1870

1871  
1872  
1873

## APPENDIX I: MODIFICATIONS TO THE CLINICAL INVESTIGATION PLAN

| Applicable Sections | Change                                                                                                                                                                                                                                                                                                                                                                                                                                           | Rationale                                                                                                                                                                                                                                         |
|---------------------|--------------------------------------------------------------------------------------------------------------------------------------------------------------------------------------------------------------------------------------------------------------------------------------------------------------------------------------------------------------------------------------------------------------------------------------------------|---------------------------------------------------------------------------------------------------------------------------------------------------------------------------------------------------------------------------------------------------|
| Contact information | <ul style="list-style-type: none"> <li>Updated Contacts</li> </ul>                                                                                                                                                                                                                                                                                                                                                                               | <ul style="list-style-type: none"> <li>Added international contacts and CRO contact information</li> </ul>                                                                                                                                        |
| Section 1           | <ul style="list-style-type: none"> <li>Updated number of sites in each geography</li> <li>Added the <math>\geq</math> symbol</li> </ul>                                                                                                                                                                                                                                                                                                          | <ul style="list-style-type: none"> <li>Study scope for geographies shifted</li> <li>To clarify inclusion criteria</li> </ul>                                                                                                                      |
| Section 3           | <ul style="list-style-type: none"> <li>Inserted software model numbers</li> <li>Updated component name</li> </ul>                                                                                                                                                                                                                                                                                                                                | <ul style="list-style-type: none"> <li>Not previously included</li> <li>Consistency of naming</li> </ul>                                                                                                                                          |
| Section 4           | <ul style="list-style-type: none"> <li>Removed exception to ISO 14155</li> <li>Provided version of Clinical Evaluation Report</li> </ul>                                                                                                                                                                                                                                                                                                         | <ul style="list-style-type: none"> <li>ISO 14155 was used as a guidance for development of CIP to reflect good clinical practice</li> <li>Not previously listed</li> </ul>                                                                        |
| Section 5           | <ul style="list-style-type: none"> <li>Updated exclusion criteria regarding creatinine clearance</li> </ul>                                                                                                                                                                                                                                                                                                                                      | <ul style="list-style-type: none"> <li>Provided a window for how recent a value could be used for consideration of exclusion criteria</li> </ul>                                                                                                  |
| Section 6           | <ul style="list-style-type: none"> <li>Updated equipment requirements with needed capabilities at sites for ECG and ECHO monitoring</li> <li>Updated blood sample collection were 5 tubes will be collected and sent to Quest (CRO) and no blood samples will be sent for local analysis and how to manage patient already enrolled in the study.</li> <li>Added system modification form and symptomatology to information collected</li> </ul> | <ul style="list-style-type: none"> <li>Added clarity to sites equipment needs</li> <li>Blood sample collection process was finalized and updated as appropriate</li> <li>Consistency with Table 3</li> </ul>                                      |
| Section 7           | <ul style="list-style-type: none"> <li>Clarified information on storage, use, handling and traceability of the device</li> </ul>                                                                                                                                                                                                                                                                                                                 | <ul style="list-style-type: none"> <li>Clarity of information</li> </ul>                                                                                                                                                                          |
| Section 9           | <ul style="list-style-type: none"> <li>Updated AE collection to capture all SAEs and device deficiencies and guidance on retrospective collection of SAEs and device deficiencies.</li> </ul>                                                                                                                                                                                                                                                    | <ul style="list-style-type: none"> <li>Meet competent authority reporting requirements</li> </ul>                                                                                                                                                 |
| Section 10          | <ul style="list-style-type: none"> <li>Included language specifying no additional tests required compared to standard of care</li> </ul>                                                                                                                                                                                                                                                                                                         | <ul style="list-style-type: none"> <li>To confirm no additional risk assumed by patients</li> </ul>                                                                                                                                               |
| Section 13          | <ul style="list-style-type: none"> <li>Added device interrogation to be kept at site</li> </ul>                                                                                                                                                                                                                                                                                                                                                  | <ul style="list-style-type: none"> <li>Guidance for site</li> </ul>                                                                                                                                                                               |
| Section 16          | <ul style="list-style-type: none"> <li>Added documents to be maintained by Investigator and Sponsor</li> <li>Added investigator requirement to report failure to obtain informed consent to their IRB</li> </ul>                                                                                                                                                                                                                                 | <ul style="list-style-type: none"> <li>Documents already being done by investigator and sponsor, thus added to CIP.</li> <li>Thorough list of investigator reporting responsibilities</li> </ul>                                                  |
| Throughout Document | <ul style="list-style-type: none"> <li>Switch terms after initial mention to acronyms e.g. IRB, ICF</li> <li>Grammatical, spelling, and wording changes</li> <li>Removed reference of MEA as possible geography for conducting the study</li> <li>Clinical Investigational Plan added to footer</li> <li>Added "and dated" when referring to signing</li> </ul>                                                                                  | <ul style="list-style-type: none"> <li>Ease of reading</li> <li>Ease of reading</li> <li>MEA no longer within scope</li> <li>Document clarity</li> <li>To clarify enrollment specifications</li> <li>AFEQT will no longer be collected</li> </ul> |

|  |                                                          |  |
|--|----------------------------------------------------------|--|
|  | of ICF<br>• Removal of references to AFEQT questionnaire |  |
|--|----------------------------------------------------------|--|

1874

1875



1876 **APPENDIX J: LITERATURE REVIEW, PRE-CLINICAL**  
1877 **TESTING AND PREVIOUS INVESTIGATIONS**

1878

1879 For the market released Reveal ICM, a literature review, summary of pre-clinical testing,  
1880 previous clinical investigations, and market experience is available in the Clinical  
1881 Evaluation Report and will be provided, upon request, to participating centers under  
1882 separate cover.

1883

1884  
1885  
1886  
1887  
1888  
1889  
1890  
1891  
1892  
1893  
1894  
1895  
1896  
1897  
1898  
1899  
1900  
1901  
1902  
1903  
1904  
1905  
1906  
1907  
1908  
1909  
1910  
1911  
1912  
1913  
1914  
1915  
1916  
1917  
1918  
1919  
1920  
1921  
1922  
1923  
1924  
1925  
1926  
1927  
1928  
1929

## APPENDIX K: BIBLIOGRAPHY

1. Fuster V, Ryden L, Cannom D, et al. ACC/AHA/ESC 2006 Guidelines for the Management of Patients with Atrial Fibrillation: a report of the American College of Cardiology/American Heart Association Task Force on Practice Guidelines and the European Society of Cardiology Committee for Practice Guidelines *Circulation*. 2006, 114: 257–354.
2. Go A, Hylek E, Phillips K, Chang Y, Henault L, Selby J, Singer DE. Prevalence of diagnosed atrial fibrillation in adults: National implications for rhythm management and stroke prevention. *JAMA*. 2001, 285: 2370–5.
3. Naccarelli G, Varker H, Lin J, Schulman K. Increasing prevalence of atrial fibrillation and flutter in the United States. *Am J Cardiol*. 2009, 104: 1534-9.
4. Fuster V, Ryden LE, Cannom DS, et al. Guidelines for the Management of Patients with Atrial Fibrillation: developed in collaboration with the European Heart Rhythm Association and Heart Rhythm Society. *Circulation*. 2006, 114:257-354.
5. Chugh SS, Blackshear JL, Shen WK, et al. Epidemiology and natural history of atrial fibrillation: clinical implications. *J Am Coll Cardiol*. 2001, 34:371-378.
6. Wattigney W, Mensah G, Croft J. Increasing trends in hospitalization for atrial fibrillation in the United States, 1985 through 1999: Implications for primary prevention. *Circulation*. 2003, 108: 711-16.
7. Wolf P, Mitchell J, Baker C, Kannel W, D'Agostino R. Impact of atrial fibrillation on mortality, stroke, and medical costs. *Arch Intern Med*. 1998, 158: 229-34.
8. Ziegler P, Koehler J, Mehra R. Comparison of continuous versus intermittent monitoring of atrial arrhythmias. *Heart Rhythm*. 2006. 3: 1445–52.
9. Ziegler P, Glotzer, TV, Daoud EG, et al. Incidence of newly detected Atrial arrhythmias via implantable devices in patients with a history of thromboembolic events. *Stroke*. 2010, 41:256-260.
10. Tayal AH, Tian M, Kelly KM, et al. Atrial fibrillation detected by mobile cardiac out-patient telemetry in cryptogenic TIA or stroke. *Neurology*. 2008, 71:1696-1701.
11. Jabaudon D, Sztajzel J, Sievert K, et al. Usefulness of ambulatory 7-day ECG monitoring for the detection of atrial fibrillation and flutter after acute stroke and transient ischemic attack. *Stroke*. 2004, 35:1647-1651.
12. Bansil S, Karim H. Detection of atrial fibrillation in patients with acute stroke. *J. Stroke Cerebrovasc Dis*. 2004, 13:12-15.

1930 13. Elijovich L, Josephson SA, Fung GL, et al. Intermittent atrial fibrillation may account for  
1931 a large proportion of otherwise cryptogenic stroke: a study of 30-day cardiac even  
1932 monitors. *J. Stroke Cerebrovasc Dis.* 2009. 18:185-189.  
1933  
1934 14. Quirino G, Giammaria M, Corbucci G, et al. Diagnosis of paroxysmal atrial fibrillation  
1935 in patient with implanted pacemakers: relationship to symptoms and other variables.  
1936 *Pacing Clin Electrophysiol.* 2009, 32:91-98.  
1937  
1938 15. Silberbauer JH, Veasey RA, Cheek E, et al., Electrophysiological characteristics  
1939 associated with symptoms in pacemaker patients with paroxysmal atrial fibrillation. *J*  
1940 *Inter Card Electrophysiol.* 2009, 26:31-40.  
1941  
1942 16. Thrall G, Lane D, Carroll D, Lip G. Quality of life in patients with atrial fibrillation: A  
1943 systematic review. *Am J Med.* 2006, 119: 448e1-419.  
1944  
1945 17. Gaynor S, Schuessler R, Bailey M et al. Surgical treatment for atrial fibrillation:  
1946 Predictors of late reoccurrence. *J Thorac Cardiovas Surg* 2005, 129: 104-11.  
1947  
1948 18. Welles CC, Whooley MA, Na B., et al. The CHADS<sub>2</sub> score predicts ischemic stroke in  
1949 the absence of atrial fibrillation among subjects with coronary heart disease: Data from  
1950 the Heart and Soul Study. *Am Heart J.* 2011, 162:555-561.  
1951  
1952 19. Lip G and Halperin, J. Improving stroke risk stratification in atrial fibrillation. *Am J*  
1953 *Medicine.* 2010, 123: 484-8.  
1954  
1955 20. De Vos, CB, Pisters, R, Mieuwlaat, R., et al. Progression from Paroxysmal to  
1956 Persistent Atrial Fibrillation. *J Am Coll Cardiol.* 2010. 55:725-731.  
1957  
1958 21. Ziegler PD, Glotzer TV, Daoud EG, et al. Detection of previously undiagnosed atrial  
1959 fibrillation in patients with stroke risk factors and usefulness of continuous monitoring  
1960 in primary stroke prevention. *Am J Cardiol* 2012 (in press).  
1961  
1962  
1963  
1964  
1965  
1966  
1967
